# Supplementary material for: An ARID3A-dependent progenitor lineage confers developmental robustness to palate morphogenesis
Source: Research Square preprint supplement (doi:10.21203/rs.3.rs-8871167/v1), 2026-02-24
Supplement: Supplementary file 1 [file 4d1e054b837b848925319b87.xlsx]

## Sheet: Sheet1
chr	start	end
chr14	43106077	43106577
chr5	71531317	71531817
chr7	14798825	14799325
chr3	103198222	103198722
chr7	96436618	96437118
chr10	101445998	101446498
chr6	115270773	115271273
chr2	87937204	87937704
chr16	83364444	83364944
chr18	3008395	3008895
chr5	39533739	39534239
chr7	59207515	59208015
chr19	42347177	42347677
chr4	87708656	87709156
chr11	115656117	115656617
chr10	8319948	8320448
chr5	68431454	68431954
chr8	20562746	20563246
chr6	143467022	143467522
chr15	103909466	103909966
chr3	95819445	95819945
chr14	26034252	26034752
chr8	20303382	20303882
chr1	17959605	17960105
chr7	138694593	138695093
chr3	113270033	113270533
chr10	84548812	84549312
chr1	164737158	164737658
chr1	74655637	74656137
chrX	114107237	114107737
chr7	66060242	66060742
chr5	15689684	15690184
chr12	108071266	108071766
chrY	60757905	60758405
chr15	76671392	76671892
chr9	27980845	27981345
chr2	165676664	165677164
chr2	9215583	9216083
chr13	65373815	65374315
chr6	145276829	145277329
chr11	50755390	50755890
chr17	13111566	13112066
chr1	149582685	149583185
chrX	74539800	74540300
chr7	20445636	20446136
chr14	7064926	7065426
chr5	95258589	95259089
chr8	20560914	20561414
chr17	80468395	80468895
chr15	61876452	61876952
chr10	40838650	40839150
chrX	94972180	94972680
chr5	101977643	101978143
chr4	23440371	23440871
chr1	85204604	85205104
chr14	64490761	64491261
chr18	86050401	86050901
chr1	156752433	156752933
chr7	24744146	24744646
chr6	33558846	33559346
chr17	53758995	53759495
chr7	80779369	80779869
chr12	70918290	70918790
chr12	81586890	81587390
chr7	111741038	111741538
chr14	85180391	85180891
chr10	61543057	61543557
chr11	71841672	71842172
chr5	31226367	31226867
chr10	32082560	32083060
chr7	51806877	51807377
chr3	47978695	47979195
chr7	22409624	22410124
chr9	66946198	66946698
chr4	121177112	121177612
chr14	26093943	26094443
chr14	86596867	86597367
chr4	49809360	49809860
chr11	3158560	3159060
chr17	52659328	52659828
chr7	15268355	15268855
chr4	131187542	131188042
chr3	85689555	85690055
chr17	13376492	13376992
chr18	4479727	4480227
chr7	74739658	74740158
chr5	79737849	79738349
chr1	96720344	96720844
chr7	41797370	41797870
chr4	53328717	53329217
chr2	51030580	51031080
chr19	49346664	49347164
chr18	60532122	60532622
chr13	47204286	47204786
chr2	31745417	31745917
chr17	93019105	93019605
chr1	110937907	110938407
chr6	96787685	96788185
chr12	98156050	98156550
chr15	102601882	102602382
chr6	123522563	123523063
chr19	30628893	30629393
chr13	4340924	4341424
chr1	60728545	60729045
chr18	46097131	46097631
chr6	97010118	97010618
chr9	108969945	108970445
chr8	60818405	60818905
chr7	27660816	27661316
chr1	85343663	85344163
chr11	56800442	56800942
chr3	92232934	92233434
chr3	106033536	106034036
chr14	7078817	7079317
chr11	52707003	52707503
chr5	61215979	61216479
chr6	83852505	83853005
chr12	77150536	77151036
chr16	34063766	34064266
chr17	45497336	45497836
chr2	137188813	137189313
chr16	58004806	58005306
chr2	135517906	135518406
chrY	77288225	77288725
chr7	133635482	133635982
chrY	70918829	70919329
chr3	101472732	101473232
chr5	123210038	123210538
chr8	24770422	24770922
chr6	24929268	24929768
chr5	59569955	59570455
chr2	104011856	104012356
chr1	70353618	70354118
chr13	31233566	31234066
chr19	54996894	54997394
chr18	45851195	45851695
chr9	82786055	82786555
chr17	35916385	35916885
chr1	164644495	164644995
chr8	20367620	20368120
chr19	41472146	41472646
chr14	81650410	81650910
chr4	149438568	149439068
chr17	37291102	37291602
chr7	53681458	53681958
chr10	35314908	35315408
chr17	23144472	23144972
chr14	23022535	23023035
chr11	24100372	24100872
chr17	68440873	68441373
chr7	35971374	35971874
chrY	80714099	80714599
chr7	140024775	140025275
chr19	24086302	24086802
chr9	114321213	114321713
chr14	6893716	6894216
chr4	54670590	54671090
chr18	11632865	11633365
chr10	33888998	33889498
chr17	22493903	22494403
chr3	89370453	89370953
chr7	128989346	128989846
chrX	32073394	32073894
chr1	60323236	60323736
chr4	52143317	52143817
chr4	84894892	84895392
chr2	78510427	78510927
chrX	56883971	56884471
chr19	53500922	53501422
chr4	62574712	62575212
chr16	40287200	40287700
chr7	126043879	126044379
chr3	59377057	59377557
chrY	70230877	70231377
chr4	122711653	122712153
chr16	4027772	4028272
chr1	82505174	82505674
chr11	100366320	100366820
chr3	136175387	136175887
chr8	7151285	7151785
chr9	32955901	32956401
chr8	18205547	18206047
chr12	12662676	12663176
chr7	92571499	92571999
chr9	8280004	8280504
chr17	18548784	18549284
chr13	68868311	68868811
chr18	8014527	8015027
chr14	5435852	5436352
chr4	28461917	28462417
chr2	68130179	68130679
chr13	66732333	66732833
chr7	20118093	20118593
chr13	75698948	75699448
chr11	19568989	19569489
chr5	31139386	31139886
chr1	14979249	14979749
chr14	54772734	54773234
chr4	61760169	61760669
chr15	71514877	71515377
chr18	4699416	4699916
chr6	77209835	77210335
chr5	6488161	6488661
chr4	146566826	146567326
chr12	46272218	46272718
chr3	50958063	50958563
chr10	53074411	53074911
chrY	73042333	73042833
chr7	11251205	11251705
chr14	6608417	6608917
chr4	140306966	140307466
chr7	22210742	22211242
chr6	29077285	29077785
chr1	21584098	21584598
chr13	43364174	43364674
chr10	30483657	30484157
chr6	74700186	74700686
chr18	4195745	4196245
chr18	89683530	89684030
chr4	146480658	146481158
chr6	48000232	48000732
chr6	77701384	77701884
chr2	51833524	51834024
chr17	33869544	33870044
chr6	95986644	95987144
chr16	41492068	41492568
chr11	103132848	103133348
chr14	7695423	7695923
chr5	105419646	105420146
chr6	7611237	7611737
chr2	32056043	32056543
chr3	70455493	70455993
chr17	35404370	35404870
chr5	148775917	148776417
chrY	43769813	43770313
chr2	73593978	73594478
chr14	58057666	58058166
chr7	27239118	27239618
chr15	81495342	81495842
chr14	58325656	58326156
chr13	65653214	65653714
chr7	21982414	21982914
chr1	137656966	137657466
chrY	32117033	32117533
chr3	18722385	18722885
chr1	25668475	25668975
chr3	34851912	34852412
chr8	20441162	20441662
chr2	162151882	162152382
chr3	28644076	28644576
chr1	101929232	101929732
chrY	52046623	52047123
chr5	14984563	14985063
chr15	18125258	18125758
chr15	11729371	11729871
chr19	55000657	55001157
chr17	75901254	75901754
chr16	58463387	58463887
chr9	47589864	47590364
chr16	32102254	32102754
chr14	4412475	4412975
chr5	77310047	77310547
chr9	90811848	90812348
chr10	45587610	45588110
chr16	89784506	89785006
chr7	142919093	142919593
chr3	11596977	11597477
chr4	139957515	139958015
chrX	26434104	26434604
chr15	49108771	49109271
chr1	178085331	178085831
chr18	64720344	64720844
chr14	106302020	106302520
chr1	12550117	12550617
chr13	94739972	94740472
chrX	125082359	125082859
chr15	79703258	79703758
chr10	92910189	92910689
chr1	26352673	26353173
chr11	17610258	17610758
chr4	147376156	147376656
chr15	34811597	34812097
chr12	8404680	8405180
chr7	96195063	96195563
chr12	81584537	81585037
chr13	24657112	24657612
chr14	43250000	43250500
chr1	85324339	85324839
chr10	56952301	56952801
chr12	109903007	109903507
chr6	124862062	124862562
chr2	127796656	127797156
chr2	20387598	20388098
chr7	96912352	96912852
chr2	133068925	133069425
chr19	39603790	39604290
chr10	80148542	80149042
chr14	9127371	9127871
chr5	89180011	89180511
chr5	15507753	15508253
chr6	87198637	87199137
chrX	15393442	15393942
chr18	14678658	14679158
chr16	46979229	46979729
chr8	102129190	102129690
chr11	116973170	116973670
chr6	100438766	100439266
chr14	41909729	41910229
chr17	29492646	29493146
chr4	147353589	147354089
chr15	86873430	86873930
chr17	72577021	72577521
chr16	4743506	4744006
chr6	30804764	30805264
chr10	80342301	80342801
chr16	32752185	32752685
chr15	84311796	84312296
chr14	83700603	83701103
chr13	75678383	75678883
chr13	51990046	51990546
chr5	61880185	61880685
chr9	24154374	24154874
chr11	12960294	12960794
chr17	9783633	9784133
chr16	97702501	97703001
chr7	103292416	103292916
chrX	41888673	41889173
chr13	36847339	36847839
chr9	101433513	101434013
chr8	20327055	20327555
chr18	39933531	39934031
chr13	55734136	55734636
chr3	144082097	144082597
chr6	75436426	75436926
chr2	17615062	17615562
chr13	23574210	23574710
chr7	22524192	22524692
chr14	3599880	3600380
chr6	132446100	132446600
chr7	15261076	15261576
chr11	98616745	98617245
chr14	101787925	101788425
chr2	27049334	27049834
chr11	112878390	112878890
chr11	64457401	64457901
chr6	32221024	32221524
chr6	145898859	145899359
chr12	20159313	20159813
chr13	87064126	87064626
chr5	114975837	114976337
chr5	61779223	61779723
chr9	37334675	37335175
chr6	144209622	144210122
chr1	88526317	88526817
chrX	91820060	91820560
chr10	125479732	125480232
chr6	27120081	27120581
chr6	3200956	3201456
chr18	21205594	21206094
chr8	22258836	22259336
chr2	28640877	28641377
chr13	45471096	45471596
chr10	41314580	41315080
chr2	177165115	177165615
chr6	101138714	101139214
chr7	28372776	28373276
chr3	16496652	16497152
chr13	74706270	74706770
chr14	121287525	121288025
chr17	39762737	39763237
chrX	126535776	126536276
chrX	86973566	86974066
chr5	120828527	120829027
chr13	4460111	4460611
chr6	13255648	13256148
chr7	82219816	82220316
chr5	135465379	135465879
chr13	16945316	16945816
chr16	31282576	31283076
chr10	114167341	114167841
chr3	54419281	54419781
chr6	49994435	49994935
chrY	22717890	22718390
chr6	66769532	66770032
chr7	64133147	64133647
chr14	41567797	41568297
chrY	38364963	38365463
chr11	101171237	101171737
chr14	75335955	75336455
chr3	42503809	42504309
chr8	13590400	13590900
chr2	167289025	167289525
chr14	32942238	32942738
chr15	14811634	14812134
chr1	190084482	190084982
chr5	127747737	127748237
chr7	15656302	15656802
chr8	71569841	71570341
chr6	41928307	41928807
chr9	91165311	91165811
chr12	83896200	83896700
chr4	147655077	147655577
chr19	25728389	25728889
chr14	20285038	20285538
chrX	16081159	16081659
chr1	165533283	165533783
chr8	88616722	88617222
chr15	79209311	79209811
chr19	39885459	39885959
chr11	18107096	18107596
chr15	100562616	100563116
chr3	51622710	51623210
chrX	159299590	159300090
chr14	5051751	5052251
chrX	86827958	86828458
chr2	108403752	108404252
chr9	29277516	29278016
chr9	96835389	96835889
chr5	51116517	51117017
chr4	21388712	21389212
chr7	96010846	96011346
chr14	51602980	51603480
chr2	118663160	118663660
chr1	85130781	85131281
chr18	62274096	62274596
chr1	85242947	85243447
chr15	60201172	60201672
chr3	92261586	92262086
chr6	126449960	126450460
chr2	91124597	91125097
chr9	40899292	40899792
chr10	33821969	33822469
chr13	77699383	77699883
chr5	62331987	62332487
chr8	67364729	67365229
chr14	41458056	41458556
chr2	177255226	177255726
chr12	111448221	111448721
chr4	23081783	23082283
chr5	15549972	15550472
chr2	158287523	158288023
chr6	83267707	83268207
chr11	120539972	120540472
chr4	145872679	145873179
chr1	73853390	73853890
chr7	22958873	22959373
chr8	69183959	69184459
chr11	98044886	98045386
chr16	34024093	34024593
chr7	20527409	20527909
chr10	10572236	10572736
chr2	121547037	121547537
chr3	113302568	113303068
chr2	142790123	142790623
chr8	20322952	20323452
chr17	24571902	24572402
chr8	22001500	22002000
chr15	13770763	13771263
chr1	166404613	166405113
chr10	3606138	3606638
chr3	70810381	70810881
chr5	151529134	151529634
chr7	20503732	20504232
chr6	67506855	67507355
chr2	73064456	73064956
chr17	45953705	45954205
chr7	6433526	6434026
chr5	89085441	89085941
chr13	28470083	28470583
chr5	79021360	79021860
chrX	146036346	146036846
chr14	84733702	84734202
chr10	78821444	78821944
chr5	95004480	95004980
chr3	61273303	61273803
chr9	87946287	87946787
chr6	85876749	85877249
chr2	177160380	177160880
chr13	47632113	47632613
chr19	13538301	13538801
chr17	55383844	55384344
chr1	149510755	149511255
chr5	7654368	7654868
chr14	5807793	5808293
chr14	109676091	109676591
chrX	117094761	117095261
chr16	36328442	36328942
chr19	42730625	42731125
chr10	41842639	41843139
chr4	145861930	145862430
chr2	170641836	170642336
chr18	73343206	73343706
chr8	115800415	115800915
chr1	146451255	146451755
chrX	65713318	65713818
chr8	79027942	79028442
chr1	82504080	82504580
chr6	54531037	54531537
chr8	19788133	19788633
chr7	15490138	15490638
chr11	45062104	45062604
chr11	19567906	19568406
chr14	43294696	43295196
chr2	24242988	24243488
chrY	73699292	73699792
chr8	19966443	19966943
chr8	20432917	20433417
chr8	71142476	71142976
chr11	3176597	3177097
chr17	74762526	74763026
chr4	75073695	75074195
chr16	17901699	17902199
chr4	120088371	120088871
chr1	125374671	125375171
chr1	6171861	6172361
chr16	32561142	32561642
chr6	132599786	132600286
chr17	13363337	13363837
chr7	59742406	59742906
chr2	39782593	39783093
chr17	6559454	6559954
chr10	104666081	104666581
chr3	139570749	139571249
chr8	116894483	116894983
chr1	13268457	13268957
chr7	21938824	21939324
chr14	7307037	7307537
chr13	96473319	96473819
chr13	119604220	119604720
chr1	156551649	156552149
chr8	112754151	112754651
chr17	81404074	81404574
chr1	166767268	166767768
chr14	7031085	7031585
chr14	3692266	3692766
chr2	14119430	14119930
chr8	91413878	91414378
chr7	45154164	45154664
chr8	82133070	82133570
chr7	22093027	22093527
chr16	71372211	71372711
chr14	107154826	107155326
chr9	115078424	115078924
chr3	134011183	134011683
chrY	27952873	27953373
chr6	112706188	112706688
chr6	110047069	110047569
chr6	4876944	4877444
chr14	6085057	6085557
chr1	84121678	84122178
chr19	29621496	29621996
chr19	43716050	43716550
chr16	67810484	67810984
chr10	55715997	55716497
chrY	63372706	63373206
chr8	126331736	126332236
chr7	84731033	84731533
chr4	53386902	53387402
chr6	125421943	125422443
chr1	128899615	128900115
chr16	41199892	41200392
chr7	4023437	4023937
chr8	33606011	33606511
chrY	84338086	84338586
chrX	151583247	151583747
chr4	147124469	147124969
chr17	13038917	13039417
chr4	146492823	146493323
chr5	16453902	16454402
chr12	31050317	31050817
chr16	94569240	94569740
chr16	67632938	67633438
chr11	106726808	106727308
chr10	58237257	58237757
chr7	93752191	93752691
chr7	15157572	15158072
chr4	96179387	96179887
chr11	94866235	94866735
chr4	146559707	146560207
chrY	87858749	87859249
chr12	6078408	6078908
chr5	68509054	68509554
chrY	23406522	23407022
chr1	19176064	19176564
chr13	92496246	92496746
chr2	156197849	156198349
chr9	56547459	56547959
chrX	145785904	145786404
chr17	57856065	57856565
chr4	146655314	146655814
chr11	89495142	89495642
chr11	119813273	119813773
chr5	81381700	81382200
chr16	3043138	3043638
chr8	118846980	118847480
chr1	58815085	58815585
chr6	110091171	110091671
chr12	46862043	46862543
chr17	33284267	33284767
chr17	68941864	68942364
chr6	46678791	46679291
chr6	97179107	97179607
chr7	8672305	8672805
chr2	27539867	27540367
chrX	40365044	40365544
chr11	113042827	113043327
chr5	145336425	145336925
chr7	132732915	132733415
chr7	31407683	31408183
chr2	144892976	144893476
chr9	79408995	79409495
chr4	35536877	35537377
chr17	78480393	78480893
chr10	120089113	120089613
chr8	118538929	118539429
chr2	151383253	151383753
chr5	51799409	51799909
chr13	33441916	33442416
chr13	66247206	66247706
chr15	41074895	41075395
chrX	121738483	121738983
chr16	27132052	27132552
chr3	67159608	67160108
chr18	19535476	19535976
chr4	147775422	147775922
chr17	13322520	13323020
chr7	111992645	111993145
chr12	20391190	20391690
chr15	64052598	64053098
chr13	116144252	116144752
chr7	21573294	21573794
chr18	57561277	57561777
chr6	5608290	5608790
chr14	41489070	41489570
chr14	5332363	5332863
chr10	84176577	84177077
chrX	121554590	121555090
chr1	85623191	85623691
chr2	147345875	147346375
chr9	103014198	103014698
chr9	73829598	73830098
chr5	20090361	20090861
chr5	52810518	52811018
chr3	33247306	33247806
chr16	73997346	73997846
chrX	47738803	47739303
chr14	64596868	64597368
chr7	59857644	59858144
chr6	64332871	64333371
chr7	21497743	21498243
chr13	77530863	77531363
chr12	91551486	91551986
chr5	15037202	15037702
chrX	64626055	64626555
chr7	22756222	22756722
chr5	79077732	79078232
chr15	42002431	42002931
chr13	57202352	57202852
chr11	56495624	56496124
chr7	130340478	130340978
chr14	59833805	59834305
chr13	97731065	97731565
chr1	127875498	127875998
chr15	90283638	90284138
chr5	94801340	94801840
chr8	21279083	21279583
chr2	20042232	20042732
chr18	85319528	85320028
chrX	94883492	94883992
chr13	25012461	25012961
chr17	13386618	13387118
chr16	67636232	67636732
chr17	71488344	71488844
chrX	27838723	27839223
chr3	62357027	62357527
chr5	57019559	57020059
chrX	33500594	33501094
chr4	147722783	147723283
chr5	148750261	148750761
chr6	80384339	80384839
chr4	88802977	88803477
chr5	140502291	140502791
chrX	79149539	79150039
chr1	87469088	87469588
chr10	33676934	33677434
chr10	52058370	52058870
chr19	38601116	38601616
chr4	100650106	100650606
chr10	88654899	88655399
chr13	32305204	32305704
chr16	86131564	86132064
chr17	90105464	90105964
chr5	146743978	146744478
chr2	39778917	39779417
chr7	23182502	23183002
chr9	76813018	76813518
chrX	123338694	123339194
chr8	85366917	85367417
chr16	41196606	41197106
chr18	15088822	15089322
chr19	58974227	58974727
chr6	83889197	83889697
chr15	4414740	4415240
chr16	41198751	41199251
chr4	146809198	146809698
chr7	35025988	35026488
chr16	55961360	55961860
chr12	114788287	114788787
chr2	96954863	96955363
chr4	98923106	98923606
chr13	65488901	65489401
chr15	56181395	56181895
chrX	128729509	128730009
chr7	89824632	89825132
chr5	80474239	80474739
chr14	3689933	3690433
chr8	71147581	71148081
chr5	141993451	141993951
chr13	65525126	65525626
chr4	73994254	73994754
chr2	72241872	72242372
chr5	37783582	37784082
chr18	40709877	40710377
chr7	59137620	59138120
chr8	101981509	101982009
chr10	60514801	60515301
chr15	52653847	52654347
chr15	67267140	67267640
chr10	5266012	5266512
chr4	133245020	133245520
chr12	97043277	97043777
chr3	159226393	159226893
chr6	96449184	96449684
chr1	151869708	151870208
chr17	23440093	23440593
chrX	80211616	80212116
chr14	7375378	7375878
chr5	63849064	63849564
chr2	51889724	51890224
chr4	126899900	126900400
chr2	179193368	179193868
chr9	32956390	32956890
chr6	97373253	97373753
chr13	96864856	96865356
chr13	98086069	98086569
chr6	114538743	114539243
chr18	43863408	43863908
chr1	104220366	104220866
chr8	116815844	116816344
chr10	81974084	81974584
chr7	57118436	57118936
chr7	62012748	62013248
chr16	76060396	76060896
chrY	26630573	26631073
chr5	25929155	25929655
chr11	117504326	117504826
chr13	104488368	104488868
chr3	26452357	26452857
chrX	170820279	170820779
chr9	98452888	98453388
chr12	23693704	23694204
chr6	117336980	117337480
chr15	67918601	67919101
chr16	3127870	3128370
chr7	141863404	141863904
chr5	68739877	68740377
chr16	3247307	3247807
chr15	3167084	3167584
chr11	115730544	115731044
chr9	76470539	76471039
chr2	3439516	3440016
chr4	146161239	146161739
chr14	5568364	5568864
chr10	83467592	83468092
chr4	93844200	93844700
chr15	46256454	46256954
chr3	10614599	10615099
chr17	41660065	41660565
chr7	21033739	21034239
chr17	6445461	6445961
chr16	16958745	16959245
chr7	22724072	22724572
chr15	4856062	4856562
chr14	59799699	59800199
chr16	55906509	55907009
chr6	87472271	87472771
chr6	13771800	13772300
chr9	61186393	61186893
chr13	29158264	29158764
chr11	60815089	60815589
chr16	87296496	87296996
chr7	83334618	83335118
chr19	58775557	58776057
chr17	70758451	70758951
chr2	35525584	35526084
chr15	66998355	66998855
chr1	85597475	85597975
chrY	2877268	2877768
chr6	58485505	58486005
chr18	57812612	57813112
chr13	55782966	55783466
chr10	103110301	103110801
chr14	25894305	25894805
chr1	183299893	183300393
chr9	96852749	96853249
chr7	74568748	74569248
chr6	80656114	80656614
chr12	33232158	33232658
chr7	144731106	144731606
chr13	65433756	65434256
chr13	8814859	8815359
chr9	83351271	83351771
chr4	110097587	110098087
chr15	100337190	100337690
chr4	63017230	63017730
chr7	28645060	28645560
chr10	80715311	80715811
chr12	68917231	68917731
chr3	34456409	34456909
chr12	32951317	32951817
chr18	76710304	76710804
chr1	94582307	94582807
chr7	44251149	44251649
chr19	54644455	54644955
chrY	31968603	31969103
chr17	68945344	68945844
chr1	89819719	89820219
chr17	92696232	92696732
chr3	14721112	14721612
chr6	25883675	25884175
chr6	96291194	96291694
chr17	47083090	47083590
chr5	46464628	46465128
chr11	13605566	13606066
chr18	79871025	79871525
chr2	118111104	118111604
chr2	138837337	138837837
chr4	36734211	36734711
chr16	58654109	58654609
chr8	19691734	19692234
chr4	40934525	40935025
chr1	6919397	6919897
chr1	11240829	11241329
chr5	36248888	36249388
chr2	158264177	158264677
chr4	62865219	62865719
chr1	175342071	175342571
chr9	61825681	61826181
chr4	94864224	94864724
chr11	46316303	46316803
chr17	13358171	13358671
chr7	20765924	20766424
chr8	71805035	71805535
chr10	22251627	22252127
chr7	137646093	137646593
chr17	80121320	80121820
chr16	9065179	9065679
chr6	112239225	112239725
chr15	29650286	29650786
chr2	93606268	93606768
chr14	58075801	58076301
chr5	15635188	15635688
chrY	63745676	63746176
chr10	66687115	66687615
chr1	85249013	85249513
chr8	71833965	71834465
chr7	30170065	30170565
chr5	142902790	142903290
chr11	118356493	118356993
chr2	139098462	139098962
chr17	86975601	86976101
chr2	71068340	71068840
chr18	84604240	84604740
chr6	43790409	43790909
chr14	7110286	7110786
chr5	145652048	145652548
chr4	131896129	131896629
chr18	83177501	83178001
chr2	39403794	39404294
chr7	39288899	39289399
chr6	142155171	142155671
chr10	105673370	105673870
chr2	153553439	153553939
chr4	147393533	147394033
chr6	112707686	112708186
chrX	75611787	75612287
chr16	88792063	88792563
chr14	117856514	117857014
chr2	48483732	48484232
chr14	5078374	5078874
chr3	99421630	99422130
chr18	26791142	26791642
chr1	163675788	163676288
chr7	137642594	137643094
chr11	116762684	116763184
chr4	70474611	70475111
chr5	142905956	142906456
chr14	23022043	23022543
chr13	109415926	109416426
chr5	124327621	124328121
chrY	12544486	12544986
chr5	56498684	56499184
chr16	15316258	15316758
chr17	23519816	23520316
chr4	123436492	123436992
chr12	80823238	80823738
chr14	32752874	32753374
chr19	30964778	30965278
chr7	94295990	94296490
chr3	112834100	112834600
chr5	15019705	15020205
chr18	33017192	33017692
chr11	74223448	74223948
chr1	64169570	64170070
chr2	82335515	82336015
chr12	23534120	23534620
chr18	58998736	58999236
chr13	24585725	24586225
chr7	15200565	15201065
chr3	96489199	96489699
chr5	12841048	12841548
chr13	45017530	45018030
chr6	36085324	36085824
chr5	140610098	140610598
chr1	118488817	118489317
chr15	49255229	49255729
chr16	95011668	95012168
chr8	120789829	120790329
chr15	53470621	53471121
chr7	22177365	22177865
chr10	42106421	42106921
chr1	85632362	85632862
chr14	26147276	26147776
chr7	19359371	19359871
chr13	106676249	106676749
chr10	27262267	27262767
chr8	20040767	20041267
chr14	39547475	39547975
chr5	49592019	49592519
chr9	119732295	119732795
chr8	59135391	59135891
chr4	23111166	23111666
chr12	108236021	108236521
chr18	33035630	33036130
chr17	23500498	23500998
chr17	73860499	73860999
chr12	111664002	111664502
chrY	35100123	35100623
chr8	20640057	20640557
chr15	86945549	86946049
chr17	94301492	94301992
chrY	53148845	53149345
chr14	16437202	16437702
chr10	80237304	80237804
chr12	19137106	19137606
chr14	7586322	7586822
chr10	41439916	41440416
chr2	148617412	148617912
chr4	146987540	146988040
chr15	59642130	59642630
chr5	53353081	53353581
chr4	147270024	147270524
chr17	13186523	13187023
chr15	56034423	56034923
chr19	39262334	39262834
chr12	79112678	79113178
chr1	8191665	8192165
chr5	145708174	145708674
chr9	120124781	120125281
chr5	60805141	60805641
chr11	111221151	111221651
chr18	42185578	42186078
chr3	156310438	156310938
chrX	169974395	169974895
chr9	25497131	25497631
chr7	145059194	145059694
chr7	15534723	15535223
chr3	68116383	68116883
chr17	33867261	33867761
chr18	26694680	26695180
chrY	90783086	90783586
chr1	39641454	39641954
chr1	85236170	85236670
chr1	133490489	133490989
chr17	80403714	80404214
chr16	42875335	42875835
chr16	87661418	87661918
chr5	86019567	86020067
chr12	102340748	102341248
chr1	85551629	85552129
chr9	95425746	95426246
chr2	170890545	170891045
chr18	27003345	27003845
chr2	42200276	42200776
chr2	113128219	113128719
chr12	62965456	62965956
chr8	37669643	37670143
chrX	94890961	94891461
chr2	168800992	168801492
chr17	4087563	4088063
chr14	5450800	5451300
chr12	52309376	52309876
chr7	77217080	77217580
chr13	36846953	36847453
chr18	63643997	63644497
chr5	42193627	42194127
chr7	124895415	124895915
chr3	88908725	88909225
chr17	52582829	52583329
chr12	86143435	86143935
chr5	118448989	118449489
chr4	55296580	55297080
chr14	88479100	88479600
chr1	130033443	130033943
chr2	177159873	177160373
chr16	35981488	35981988
chr5	15590278	15590778
chr9	7373994	7374494
chrX	19436518	19437018
chr4	107037474	107037974
chr14	83701108	83701608
chr7	62535784	62536284
chr8	19964046	19964546
chr1	85323229	85323729
chr12	46225429	46225929
chr4	60557783	60558283
chr7	45792336	45792836
chr10	118927707	118928207
chr14	81901753	81902253
chr2	11408750	11409250
chr10	63106832	63107332
chr2	46387200	46387700
chr4	138131544	138132044
chr8	126887865	126888365
chr1	139237456	139237956
chr9	53091255	53091755
chr6	3650593	3651093
chr12	3062493	3062993
chr7	52556624	52557124
chr3	152326497	152326997
chrY	32327550	32328050
chr13	29065529	29066029
chr7	138262856	138263356
chr5	103596205	103596705
chr13	37043254	37043754
chr18	90495967	90496467
chr15	24542448	24542948
chr7	92229087	92229587
chr18	34500724	34501224
chr12	59503778	59504278
chr13	65586211	65586711
chr7	127622628	127623128
chr7	15707589	15708089
chr1	174276369	174276869
chr4	146979432	146979932
chr2	129450987	129451487
chr14	114822848	114823348
chr8	121827104	121827604
chr4	109351925	109352425
chr9	61106901	61107401
chr14	31206847	31207347
chr4	147044170	147044670
chr5	84374453	84374953
chr12	12766518	12767018
chr4	147233004	147233504
chr16	20573186	20573686
chr6	123482854	123483354
chr2	18477637	18478137
chr13	99686827	99687327
chr2	86343109	86343609
chr9	42110385	42110885
chrX	14811758	14812258
chr14	29005167	29005667
chr17	33623412	33623912
chr6	136623814	136624314
chr16	22923630	22924130
chr1	93449266	93449766
chr9	96936210	96936710
chr5	3012793	3013293
chr11	7589422	7589922
chr9	58784950	58785450
chr12	28047689	28048189
chr13	62408902	62409402
chr12	101212612	101213112
chr7	15871263	15871763
chr15	81416842	81417342
chrX	118536383	118536883
chr14	62644554	62645054
chr4	146150028	146150528
chr14	21698413	21698913
chr7	15187674	15188174
chr4	143380918	143381418
chr6	107974962	107975462
chr14	10182365	10182865
chr5	28609959	28610459
chr11	4630477	4630977
chr2	150441417	150441917
chr5	105809724	105810224
chrX	137693230	137693730
chr4	35381170	35381670
chr11	121479646	121480146
chr19	12795961	12796461
chr6	36982926	36983426
chr7	9736695	9737195
chr3	67355428	67355928
chr10	104841959	104842459
chr17	19597342	19597842
chr11	79113780	79114280
chr5	15653145	15653645
chr7	79338003	79338503
chr18	76582298	76582798
chr13	35567099	35567599
chr14	110083678	110084178
chr9	33157411	33157911
chr10	30502618	30503118
chr4	146650081	146650581
chr6	68614727	68615227
chr18	18669669	18670169
chr12	59443556	59444056
chr3	94139870	94140370
chr7	10912606	10913106
chrY	53084725	53085225
chr8	122845763	122846263
chr11	68535456	68535956
chr7	135716373	135716873
chr12	23881345	23881845
chrY	29676666	29677166
chr9	97679188	97679688
chr3	97246134	97246634
chr1	88306489	88306989
chr19	13629761	13630261
chr15	92616623	92617123
chr18	88944362	88944862
chr14	68009217	68009717
chr13	66490637	66491137
chr16	24971571	24972071
chr12	87770524	87771024
chr7	45219308	45219808
chr8	20064328	20064828
chrY	65537686	65538186
chr16	14574611	14575111
chr11	28103644	28104144
chr1	180307796	180308296
chr9	12768546	12769046
chr1	59122061	59122561
chr10	111441694	111442194
chr6	42766409	42766909
chrX	119680562	119681062
chr6	62035554	62036054
chr4	122333175	122333675
chrX	110445899	110446399
chr6	133821031	133821531
chr8	106489539	106490039
chr15	7914843	7915343
chr7	144819818	144820318
chr1	47225338	47225838
chr9	70908138	70908638
chr13	119280271	119280771
chr1	83457384	83457884
chr5	123817463	123817963
chr17	38902934	38903434
chr15	50628873	50629373
chrY	83572368	83572868
chr17	35601522	35602022
chr17	71228005	71228505
chr8	20058423	20058923
chr15	11031720	11032220
chr4	147008783	147009283
chr7	22080288	22080788
chr6	112073154	112073654
chr2	90365439	90365939
chr3	92240800	92241300
chr8	85176629	85177129
chr17	63129172	63129672
chr1	117977034	117977534
chr1	102806111	102806611
chr11	121206364	121206864
chr3	21016161	21016661
chr11	115964563	115965063
chr14	87140291	87140791
chr16	70546854	70547354
chr17	66307862	66308362
chr7	20602149	20602649
chr4	83927713	83928213
chr8	18533470	18533970
chr19	9033162	9033662
chr17	27537470	27537970
chr8	20611043	20611543
chr1	142359358	142359858
chr1	158647724	158648224
chr5	67273427	67273927
chr5	83141687	83142187
chr10	98544550	98545050
chr6	138893231	138893731
chr10	108570854	108571354
chr14	110598366	110598866
chr14	21362717	21363217
chr7	15224145	15224645
chr2	119257755	119258255
chr2	37342701	37343201
chr12	54834905	54835405
chrX	41725512	41726012
chr17	43464782	43465282
chr15	79388322	79388822
chr1	148456979	148457479
chr7	130215701	130216201
chr8	96053197	96053697
chr17	79728680	79729180
chr15	27290037	27290537
chr11	69671220	69671720
chr4	29714227	29714727
chr11	102280840	102281340
chr7	75816819	75817319
chr13	83442399	83442899
chrY	10708321	10708821
chr14	6763392	6763892
chr14	5133811	5134311
chr10	53930393	53930893
chr18	85786662	85787162
chr5	80472495	80472995
chr7	93749560	93750060
chr8	71130750	71131250
chr15	25420505	25421005
chrY	14909086	14909586
chr11	5951068	5951568
chr13	6722414	6722914
chr17	6495184	6495684
chr18	62725746	62726246
chr7	95072069	95072569
chr9	106370989	106371489
chr13	111841453	111841953
chr8	20558291	20558791
chr14	105964458	105964958
chr1	85280305	85280805
chr7	15736466	15736966
chr11	95336678	95337178
chr4	117194823	117195323
chr6	64724730	64725230
chr2	116454726	116455226
chr2	123885817	123886317
chr15	39177412	39177912
chr2	7657252	7657752
chr16	87289819	87290319
chr5	22462030	22462530
chr4	123292407	123292907
chrX	137973244	137973744
chr8	20106595	20107095
chrX	148806727	148807227
chr9	73066813	73067313
chr13	87575633	87576133
chr8	20121890	20122390
chr1	85083029	85083529
chr18	63479921	63480421
chr2	26336026	26336526
chr13	100921985	100922485
chr1	19627911	19628411
chr7	70760033	70760533
chr6	117336309	117336809
chr7	59896086	59896586
chr1	85522754	85523254
chr1	34720597	34721097
chr10	93533932	93534432
chr6	59784882	59785382
chr6	37546898	37547398
chr5	3006184	3006684
chr8	125635697	125636197
chr6	99090802	99091302
chr8	114891772	114892272
chr5	15624267	15624767
chr2	179636556	179637056
chr8	64976294	64976794
chr15	83200002	83200502
chr3	28066068	28066568
chr17	13181539	13182039
chr8	20851148	20851648
chr4	146213337	146213837
chr1	135714948	135715448
chr14	4058791	4059291
chr15	19058547	19059047
chr16	8912202	8912702
chr3	148756397	148756897
chr4	10449407	10449907
chr4	96055078	96055578
chr15	52076658	52077158
chr13	26373463	26373963
chr1	93089048	93089548
chr17	15607284	15607784
chr1	123862046	123862546
chr16	94281325	94281825
chr1	176545305	176545805
chrY	67443433	67443933
chr3	78489180	78489680
chr4	147641696	147642196
chr11	79845735	79846235
chr9	38718832	38719332
chr17	77829728	77830228
chr6	142151006	142151506
chr1	92756664	92757164
chr4	35042535	35043035
chr7	15214875	15215375
chr4	123729617	123730117
chr7	21608618	21609118
chr3	132625849	132626349
chr11	91167880	91168380
chr9	101594810	101595310
chr16	20527338	20527838
chr10	41843632	41844132
chr7	59504037	59504537
chr1	5849935	5850435
chr11	3165359	3165859
chr12	4864723	4865223
chr5	46944986	46945486
chr9	26593945	26594445
chr5	103257916	103258416
chr10	34746743	34747243
chr8	121822507	121823007
chr10	48387857	48388357
chr17	65086158	65086658
chr7	20496598	20497098
chrX	164076169	164076669
chr7	112720200	112720700
chr9	23164886	23165386
chr14	8657485	8657985
chr12	42669843	42670343
chr17	6571266	6571766
chr19	44462797	44463297
chr8	11934476	11934976
chr6	100066916	100067416
chr3	82976136	82976636
chr1	42646710	42647210
chr17	22709463	22709963
chr16	8037698	8038198
chr12	43590915	43591415
chr4	147159525	147160025
chr13	99712908	99713408
chr10	119122592	119123092
chr9	47958128	47958628
chr9	121181694	121182194
chr6	66486764	66487264
chr6	42170756	42171256
chr19	32995041	32995541
chr18	66382822	66383322
chr1	14158626	14159126
chr5	131344833	131345333
chr4	143590243	143590743
chr15	86086095	86086595
chr16	12468362	12468862
chr12	86894985	86895485
chr2	180595703	180596203
chr7	15948253	15948753
chr9	113347288	113347788
chr7	132427160	132427660
chrX	71685215	71685715
chr8	101864389	101864889
chr5	145686117	145686617
chr15	6895300	6895800
chr2	68805405	68805905
chr3	12818554	12819054
chr14	3102776	3103276
chr11	52776295	52776795
chr7	131995691	131996191
chr7	38610678	38611178
chr5	15469662	15470162
chr7	121643005	121643505
chr2	174900318	174900818
chr2	39364616	39365116
chr3	120944200	120944700
chr3	69642505	69643005
chr3	32308740	32309240
chr18	47774036	47774536
chr16	89195086	89195586
chr2	107982693	107983193
chr14	4557804	4558304
chr12	67264946	67265446
chr11	121205471	121205971
chr7	124809747	124810247
chrX	100862632	100863132
chr8	20543296	20543796
chr8	30874742	30875242
chr8	80632591	80633091
chr17	75897560	75898060
chr10	56727039	56727539
chr1	124648233	124648733
chr8	19683214	19683714
chr7	22626220	22626720
chr3	83298158	83298658
chr13	29254471	29254971
chrY	58516239	58516739
chr1	86441243	86441743
chr4	107511245	107511745
chr4	141424478	141424978
chr17	9890163	9890663
chr11	112806727	112807227
chr15	85192492	85192992
chr17	89766362	89766862
chr8	20398013	20398513
chr5	115071649	115072149
chr14	4253458	4253958
chr2	16376347	16376847
chr18	36531018	36531518
chr18	52391074	52391574
chr11	20518452	20518952
chr7	9076305	9076805
chr1	39909783	39910283
chr19	18923618	18924118
chr7	20754623	20755123
chr13	106655970	106656470
chr15	49169842	49170342
chr14	4651344	4651844
chr3	55916915	55917415
chr13	83441826	83442326
chr8	20326305	20326805
chr8	22757210	22757710
chr3	7971380	7971880
chr12	67952205	67952705
chr8	81943691	81944191
chr5	101393852	101394352
chr13	80489399	80489899
chr5	151661385	151661885
chr9	21037496	21037996
chr11	26030998	26031498
chr1	120571123	120571623
chr18	53837210	53837710
chr5	94372850	94373350
chr14	75512563	75513063
chr7	4023846	4024346
chr9	87160793	87161293
chr12	23022562	23023062
chr9	78175473	78175973
chr13	65361223	65361723
chr1	100179985	100180485
chr9	62716276	62716776
chr2	132796852	132797352
chr6	5688420	5688920
chr6	62396113	62396613
chr4	91978793	91979293
chr6	89185156	89185656
chr8	109327517	109328017
chr9	8632766	8633266
chr9	71422005	71422505
chr7	38973880	38974380
chr2	18480121	18480621
chr16	26260199	26260699
chr11	79876430	79876930
chr13	98121969	98122469
chr3	136177810	136178310
chr11	108167525	108168025
chr14	79147286	79147786
chr8	20310639	20311139
chr7	35177914	35178414
chr5	132974864	132975364
chr7	82468419	82468919
chrY	12485323	12485823
chr5	52434068	52434568
chr6	73213736	73214236
chr3	24094043	24094543
chrX	4640036	4640536
chr12	51749663	51750163
chr1	16741621	16742121
chr18	76925535	76926035
chr8	77136962	77137462
chr3	71369633	71370133
chr7	85364212	85364712
chr13	54821764	54822264
chr17	13198059	13198559
chrY	33164830	33165330
chr18	58997309	58997809
chr3	59798094	59798594
chr5	74240140	74240640
chr7	98098781	98099281
chr19	15793909	15794409
chr15	21616986	21617486
chr12	23594395	23594895
chr8	20287576	20288076
chr7	22077624	22078124
chr10	65594611	65595111
chr16	75766642	75767142
chrX	39364738	39365238
chr13	22230403	22230903
chr11	32138911	32139411
chr16	64994629	64995129
chr8	123684442	123684942
chr1	113340328	113340828
chr8	100264993	100265493
chrY	55176704	55177204
chrX	112741515	112742015
chr7	15242720	15243220
chr1	185565902	185566402
chr14	3336882	3337382
chr13	42051259	42051759
chr11	117532442	117532942
chr10	122241247	122241747
chr7	59457796	59458296
chr17	53929997	53930497
chr7	142667825	142668325
chr18	52128423	52128923
chr2	125421905	125422405
chr7	58163089	58163589
chr2	146988156	146988656
chr4	60839806	60840306
chrX	169980172	169980672
chr4	145719265	145719765
chr12	65032848	65033348
chr9	27798093	27798593
chr2	58259823	58260323
chr12	110641825	110642325
chr2	83966545	83967045
chr1	88296109	88296609
chr11	35305552	35306052
chr14	4541335	4541835
chr10	118915867	118916367
chr9	109245739	109246239
chr19	50432636	50433136
chr12	102572563	102573063
chr13	14213093	14213593
chr17	21774659	21775159
chr7	22591257	22591757
chr11	108651544	108652044
chr7	106837746	106838246
chr3	15404561	15405061
chr2	105644722	105645222
chrX	151054689	151055189
chr3	116891324	116891824
chr18	57518797	57519297
chr14	20281874	20282374
chr11	114502348	114502848
chr5	145332964	145333464
chr5	81631861	81632361
chr1	103208296	103208796
chr10	108718727	108719227
chr7	68021707	68022207
chr17	13236199	13236699
chr6	43007283	43007783
chr18	17467795	17468295
chr1	18933293	18933793
chr18	60529969	60530469
chr13	60341095	60341595
chr7	21895609	21896109
chr4	96155215	96155715
chr4	15307970	15308470
chr13	63155003	63155503
chr7	125010382	125010882
chr17	71623653	71624153
chr4	72706727	72707227
chr6	42585826	42586326
chr12	20095376	20095876
chr3	157006696	157007196
chr2	134313752	134314252
chr2	93828548	93829048
chr5	23241730	23242230
chr6	95110320	95110820
chr1	85451996	85452496
chr18	12994292	12994792
chr16	13088588	13089088
chr5	51002084	51002584
chr1	139725739	139726239
chr16	35397988	35398488
chr13	106760488	106760988
chrX	59722737	59723237
chr7	36881735	36882235
chr13	87069622	87070122
chr7	72124943	72125443
chr3	11614516	11615016
chr18	77615782	77616282
chr5	26118938	26119438
chr10	54286158	54286658
chr8	20040307	20040807
chr14	6114729	6115229
chr10	20170433	20170933
chr14	121008288	121008788
chr3	42605251	42605751
chr18	22569259	22569759
chr18	9096066	9096566
chr7	70198983	70199483
chr3	137710968	137711468
chr11	60647787	60648287
chr9	40904559	40905059
chr9	54950483	54950983
chr4	143979754	143980254
chr8	49579698	49580198
chr2	146608048	146608548
chr10	77111060	77111560
chr19	27075390	27075890
chr8	35134699	35135199
chr13	67985895	67986395
chr4	100609752	100610252
chr2	59576978	59577478
chr11	116448215	116448715
chr14	7587557	7588057
chr8	20060612	20061112
chr4	76208322	76208822
chr17	33568385	33568885
chrX	158683354	158683854
chr14	6266107	6266607
chr4	25850344	25850844
chr7	44193618	44194118
chr5	24557330	24557830
chrX	118411400	118411900
chr6	55022694	55023194
chr5	121587717	121588217
chr13	44506213	44506713
chr10	81496413	81496913
chr14	3954686	3955186
chr2	121529740	121530240
chr6	29767803	29768303
chr15	75209130	75209630
chr10	109319121	109319621
chr7	22289866	22290366
chr13	17442599	17443099
chr17	37880356	37880856
chr14	3628835	3629335
chr2	33003859	33004359
chr18	77732614	77733114
chr3	146571542	146572042
chr19	8984326	8984826
chr8	71143443	71143943
chr10	128804580	128805080
chr13	65630507	65631007
chr1	133321651	133322151
chr14	62601118	62601618
chr16	74775984	74776484
chr6	10152777	10153277
chr16	57203421	57203921
chr17	55679316	55679816
chr6	3655104	3655604
chr8	59133319	59133819
chr4	61781763	61782263
chr7	4193167	4193667
chr10	68391795	68392295
chr13	66718451	66718951
chr7	25396472	25396972
chr11	12134641	12135141
chr14	4919788	4920288
chr19	50109059	50109559
chr12	63169598	63170098
chr13	66102646	66103146
chr6	21529690	21530190
chrX	169975543	169976043
chr6	97377428	97377928
chr7	53821960	53822460
chr1	88221954	88222454
chr11	61424403	61424903
chr5	11649641	11650141
chr5	16449861	16450361
chr13	48810476	48810976
chr13	38709618	38710118
chrY	31372175	31372675
chr6	96975621	96976121
chr18	24854012	24854512
chr4	23097410	23097910
chr4	137975154	137975654
chr2	127212766	127213266
chr1	77482686	77483186
chr4	60410893	60411393
chr14	53475498	53475998
chr6	65575545	65576045
chr10	127621299	127621799
chr3	79050022	79050522
chr8	20097541	20098041
chr12	15866054	15866554
chr2	151346563	151347063
chr14	42318518	42319018
chr15	10864410	10864910
chr3	69618673	69619173
chr10	24288206	24288706
chr8	57188259	57188759
chr14	4313441	4313941
chr5	57759139	57759639
chr16	3138962	3139462
chr5	117119782	117120282
chr17	8674801	8675301
chr7	15192168	15192668
chr5	80477209	80477709
chr5	6565800	6566300
chr8	19972235	19972735
chr8	71857774	71858274
chr5	119656859	119657359
chr2	38304046	38304546
chr13	90992739	90993239
chr17	7011953	7012453
chr18	16283429	16283929
chrX	29675877	29676377
chr13	18995513	18996013
chr14	42781914	42782414
chr5	33378173	33378673
chr8	122159048	122159548
chr8	48990536	48991036
chr12	61290574	61291074
chr4	146202205	146202705
chr17	13433648	13434148
chrX	155013677	155014177
chr6	108560360	108560860
chr4	10644771	10645271
chr12	79565615	79566115
chr6	15665125	15665625
chr7	101079052	101079552
chr2	160635710	160636210
chr4	29715344	29715844
chr8	74350104	74350604
chr8	89921827	89922327
chr13	21945084	21945584
chr17	7304548	7305048
chr7	28099923	28100423
chr10	126706559	126707059
chr12	100464924	100465424
chr14	6295214	6295714
chr14	24197337	24197837
chr6	82584265	82584765
chr3	67029189	67029689
chr12	6522937	6523437
chr13	12925697	12926197
chr1	177218285	177218785
chr8	44806402	44806902
chr6	55350165	55350665
chr19	23817801	23818301
chr8	20026650	20027150
chr17	93623717	93624217
chr5	15642926	15643426
chr14	54296287	54296787
chr7	3716052	3716552
chr10	47456190	47456690
chr10	31094993	31095493
chr17	53367908	53368408
chr7	13125823	13126323
chr2	148415198	148415698
chrX	44392277	44392777
chr11	100266570	100267070
chr3	41251555	41252055
chr11	19566631	19567131
chr7	30388311	30388811
chr7	20201207	20201707
chr17	78846117	78846617
chr15	40889173	40889673
chr14	34618916	34619416
chr11	41021633	41022133
chr3	151399759	151400259
chr18	85911425	85911925
chr2	112237747	112238247
chr16	64865661	64866161
chr6	81731624	81732124
chr1	21995430	21995930
chr5	26029704	26030204
chr13	40592609	40593109
chr1	170117686	170118186
chr2	31013794	31014294
chr12	28820608	28821108
chr4	76607181	76607681
chr10	56723455	56723955
chr4	40808086	40808586
chr7	99427832	99428332
chr1	87139214	87139714
chrY	43923264	43923764
chr10	80464248	80464748
chr15	85188865	85189365
chr3	73869856	73870356
chr8	119894380	119894880
chr9	80033068	80033568
chr4	121175895	121176395
chr7	39311984	39312484
chr1	14476749	14477249
chr9	26400995	26401495
chr11	68627970	68628470
chr7	3764237	3764737
chr16	44922730	44923230
chr3	77603588	77604088
chr13	22040881	22041381
chr13	51911536	51912036
chr18	58284911	58285411
chr9	11555674	11556174
chr4	154292484	154292984
chr14	4089366	4089866
chrX	127130127	127130627
chrX	137689783	137690283
chr1	88305651	88306151
chr5	92912380	92912880
chr2	112419026	112419526
chr9	53745177	53745677
chr15	5379268	5379768
chr2	100422414	100422914
chr10	61648387	61648887
chr3	43858715	43859215
chr4	61501137	61501637
chr4	10006002	10006502
chr13	51090391	51090891
chr2	22078399	22078899
chr11	106216464	106216964
chr14	112336198	112336698
chr6	119720949	119721449
chr1	11261613	11262113
chr5	100272187	100272687
chr3	144561468	144561968
chr18	3620842	3621342
chr18	80631307	80631807
chr2	23787280	23787780
chr18	46004242	46004742
chr1	17960604	17961104
chr2	106274284	106274784
chr7	38447683	38448183
chr9	96943012	96943512
chr14	71785042	71785542
chr10	103797058	103797558
chrY	25782083	25782583
chr18	3621959	3622459
chr17	37957314	37957814
chr7	59426463	59426963
chr10	3601268	3601768
chr19	45095833	45096333
chr1	167355392	167355892
chr2	66846120	66846620
chr13	65626963	65627463
chrY	5959844	5960344
chr5	56493643	56494143
chr8	23143173	23143673
chr17	3962885	3963385
chr9	3802333	3802833
chr7	20253346	20253846
chr16	23249908	23250408
chr16	3253935	3254435
chr11	12135463	12135963
chr13	94993915	94994415
chr17	13425026	13425526
chr5	46941477	46941977
chr4	108330050	108330550
chr11	3182305	3182805
chr13	10892370	10892870
chr4	124758620	124759120
chr1	84967242	84967742
chr15	73873480	73873980
chr5	80457545	80458045
chr1	65541985	65542485
chr9	81909374	81909874
chr14	43418777	43419277
chr13	18994109	18994609
chr11	111123293	111123793
chr5	117434945	117435445
chr2	151798887	151799387
chr18	49646010	49646510
chr9	13827243	13827743
chr2	13864059	13864559
chr14	79256075	79256575
chr5	61310596	61311096
chr14	9130047	9130547
chr1	168371723	168372223
chr2	97186452	97186952
chr4	146568154	146568654
chr2	80254190	80254690
chr15	74157459	74157959
chr8	71830048	71830548
chr8	115283932	115284432
chr19	21981952	21982452
chr1	55782508	55783008
chr2	132518013	132518513
chrY	87397828	87398328
chr1	58367142	58367642
chr6	31851916	31852416
chr9	75456051	75456551
chr4	145836230	145836730
chr11	54576871	54577371
chr6	141357114	141357614
chr7	38618105	38618605
chr9	56122151	56122651
chr6	141287087	141287587
chr13	111322291	111322791
chr1	172268926	172269426
chr9	26101729	26102229
chrX	156378562	156379062
chr10	50592388	50592888
chr19	44383028	44383528
chr10	50064063	50064563
chr2	71944983	71945483
chr3	42821790	42822290
chr4	41459206	41459706
chr2	129612961	129613461
chr9	107121762	107122262
chr3	58274057	58274557
chr3	134548807	134549307
chr13	12966319	12966819
chr14	51605205	51605705
chr3	23175844	23176344
chr8	13075728	13076228
chr4	147520324	147520824
chr16	94277685	94278185
chr17	75923084	75923584
chr16	50201619	50202119
chr11	64155956	64156456
chr14	68233197	68233697
chr17	60293633	60294133
chr17	87201953	87202453
chr8	20136489	20136989
chr7	22604164	22604664
chr2	140912057	140912557
chr1	192784434	192784934
chr4	16397101	16397601
chr1	85489529	85490029
chr4	52189782	52190282
chr16	55678079	55678579
chr7	15148419	15148919
chr15	86760634	86761134
chr13	10893933	10894433
chr6	72552739	72553239
chr5	71531951	71532451
chr14	121740233	121740733
chr4	3214209	3214709
chr5	90667771	90668271
chr6	25393205	25393705
chr6	35572401	35572901
chr19	33440490	33440990
chr17	25719999	25720499
chr4	146093243	146093743
chr7	26909749	26910249
chr14	8657931	8658431
chr11	121278849	121279349
chrX	103274251	103274751
chr4	143646824	143647324
chr4	147588275	147588775
chr7	128124204	128124704
chr9	78823550	78824050
chr15	67918097	67918597
chr1	138790565	138791065
chr12	65635288	65635788
chr8	80350364	80350864
chrX	152016417	152016917
chr5	150429131	150429631
chr9	26096532	26097032
chr7	22346109	22346609
chrX	120674599	120675099
chr12	63299277	63299777
chr14	5717568	5718068
chr4	83071902	83072402
chr11	99119578	99120078
chr1	181498677	181499177
chr17	93021851	93022351
chr17	39618600	39619100
chr14	7465596	7466096
chr12	108351337	108351837
chr3	109510406	109510906
chr13	38123713	38124213
chr13	66015198	66015698
chr8	72838699	72839199
chr18	74237732	74238232
chr8	20313888	20314388
chr15	99566089	99566589
chr2	10000080	10000580
chr5	125389889	125390389
chr7	48297881	48298381
chr6	80655033	80655533
chr10	25899860	25900360
chr14	5393603	5394103
chr10	93377909	93378409
chr8	19933930	19934430
chr6	134920066	134920566
chr14	33984695	33985195
chr14	69661334	69661834
chr13	22429002	22429502
chr9	116616229	116616729
chr8	92659892	92660392
chr4	110470376	110470876
chr16	47135112	47135612
chr6	37849030	37849530
chr1	16742502	16743002
chr5	110980159	110980659
chr1	85529891	85530391
chr4	45910081	45910581
chr4	46248578	46249078
chr16	35831810	35832310
chr4	94196661	94197161
chrY	28354355	28354855
chrY	81804293	81804793
chr8	34088784	34089284
chr6	108147844	108148344
chr18	57008052	57008552
chr6	31908966	31909466
chr2	33285470	33285970
chr9	109528041	109528541
chr15	97550613	97551113
chr7	125302747	125303247
chr6	123414422	123414922
chr9	49328733	49329233
chr1	72463663	72464163
chr1	9180768	9181268
chr10	62611190	62611690
chr16	47381239	47381739
chr1	87731564	87732064
chr8	111908526	111909026
chr18	56345130	56345630
chr13	53099798	53100298
chr14	42164722	42165222
chr11	74221237	74221737
chr14	123131152	123131652
chr4	146268565	146269065
chr1	85064046	85064546
chr6	14464999	14465499
chr12	61756788	61757288
chr7	142597139	142597639
chr13	36476550	36477050
chr19	28562792	28563292
chr5	119886165	119886665
chr1	84979402	84979902
chr2	177607944	177608444
[truncated: 15,207 more rows]
