# Supplementary material for: An ARID3A-dependent progenitor lineage confers developmental robustness to palate morphogenesis
Source: Research Square preprint supplement (doi:10.21203/rs.3.rs-8871167/v1), 2026-02-24
Supplement: Supplementary file 2 [file 67c5a7611f1585cd3ee88275.xlsx]

## Sheet: TabS6_peaks_SNPs
seqnames	start	end	width	strand	has_snp
chr14	121752007	121752507	501	*	TRUE
chr1	193144348	193144848	501	*	TRUE
chr1	193166283	193166783	501	*	TRUE
chr16	25842809	25843309	501	*	TRUE
chr2	33317609	33318109	501	*	TRUE
chr3	122081591	122082091	501	*	TRUE
chr4	46351490	46351990	501	*	TRUE
chr1	132288054	132288554	501	*	TRUE
chr9	122099604	122100104	501	*	TRUE
chr9	122173367	122173867	501	*	TRUE
chr1	193024571	193025071	501	*	TRUE
chr8	70083233	70083733	501	*	TRUE
chr1	192982636	192983136	501	*	TRUE
chr1	193159244	193159744	501	*	TRUE
chr14	121547654	121548154	501	*	TRUE
chr19	59167878	59168378	501	*	TRUE
chr16	25837558	25838058	501	*	TRUE
chr2	103980934	103981434	501	*	TRUE
chr9	67077455	67077955	501	*	TRUE
chr4	46370367	46370867	501	*	TRUE
chr14	121747637	121748137	501	*	TRUE
chr19	45535100	45535600	501	*	TRUE
chr2	33370593	33371093	501	*	TRUE
chr14	121701055	121701555	501	*	TRUE
chr9	79522331	79522831	501	*	TRUE
chr14	121534503	121535003	501	*	TRUE
chr14	121755727	121756227	501	*	TRUE
chr12	8884703	8885203	501	*	TRUE
chr8	70042515	70043015	501	*	TRUE
chr2	160321751	160322251	501	*	TRUE
chr10	80675677	80676177	501	*	TRUE
chr12	12395438	12395938	501	*	TRUE
chr14	121589497	121589997	501	*	TRUE
chr14	121712042	121712542	501	*	TRUE
chr11	96860525	96861025	501	*	TRUE
chr16	25839881	25840381	501	*	TRUE
chr15	59823159	59823659	501	*	TRUE
chr2	33371254	33371754	501	*	TRUE
chr14	121697878	121698378	501	*	TRUE
chr9	31129988	31130488	501	*	TRUE
chr1	193148653	193149153	501	*	TRUE
chr14	121713147	121713647	501	*	TRUE
chr1	188903589	188904089	501	*	TRUE
chr4	46343402	46343902	501	*	TRUE
chr12	12399975	12400475	501	*	TRUE
chrX	52628599	52629099	501	*	TRUE
chr2	33259603	33260103	501	*	TRUE
chr2	160329110	160329610	501	*	TRUE
chr1	158180083	158180583	501	*	TRUE
chr4	46339488	46339988	501	*	TRUE
chr14	121709469	121709969	501	*	TRUE
chr4	139826352	139826852	501	*	TRUE
chr3	105719654	105720154	501	*	TRUE
chr11	103711172	103711672	501	*	TRUE
chr4	46356146	46356646	501	*	TRUE
chr1	193153580	193154080	501	*	TRUE
chr14	122479621	122480121	501	*	TRUE
chr14	121784492	121784992	501	*	TRUE
chr14	121708137	121708637	501	*	TRUE
chr14	121710043	121710543	501	*	TRUE
chr4	46342718	46343218	501	*	TRUE
chr14	121731763	121732263	501	*	TRUE
chr1	191153038	191153538	501	*	TRUE
chr14	121749914	121750414	501	*	TRUE
chr14	121781108	121781608	501	*	TRUE
chr1	193131389	193131889	501	*	TRUE
chr14	47120150	47120650	501	*	TRUE
chr2	45114535	45115035	501	*	TRUE
chr9	55565508	55566008	501	*	TRUE
chr4	46355628	46356128	501	*	TRUE
chr14	121796021	121796521	501	*	TRUE
chr15	86214722	86215222	501	*	TRUE
chr14	121752870	121753370	501	*	TRUE
chr14	121738308	121738808	501	*	TRUE
chr14	121793784	121794284	501	*	TRUE
chr16	25844303	25844803	501	*	TRUE
chr14	121705537	121706037	501	*	TRUE
chr14	121764831	121765331	501	*	TRUE
chr8	10435356	10435856	501	*	TRUE
chr9	58658117	58658617	501	*	TRUE
chr4	139822525	139823025	501	*	TRUE
chr14	121761880	121762380	501	*	TRUE
chr15	25940467	25940967	501	*	TRUE
chr1	193138832	193139332	501	*	TRUE
chr9	66707101	66707601	501	*	TRUE
chr1	193180818	193181318	501	*	TRUE
chr1	193171130	193171630	501	*	TRUE
chr11	105589418	105589918	501	*	TRUE
chr1	131971260	131971760	501	*	TRUE
chr14	121711531	121712031	501	*	TRUE
chr14	22046012	22046512	501	*	TRUE
chr1	193131909	193132409	501	*	TRUE
chr10	13916874	13917374	501	*	TRUE
chr1	193155185	193155685	501	*	TRUE
chr6	35353451	35353951	501	*	TRUE
chr14	105720821	105721321	501	*	TRUE
chr2	33265451	33265951	501	*	TRUE
chr14	121781697	121782197	501	*	TRUE
chr9	122061376	122061876	501	*	TRUE
chr10	77735127	77735627	501	*	TRUE
chr12	12376439	12376939	501	*	TRUE
chr12	12396177	12396677	501	*	TRUE
chr4	139813493	139813993	501	*	TRUE
chr2	33230996	33231496	501	*	TRUE
chr12	104431287	104431787	501	*	TRUE
chr5	35082382	35082882	501	*	TRUE
chr1	132538547	132539047	501	*	TRUE
chr18	47308745	47309245	501	*	TRUE
chr9	55937889	55938389	501	*	TRUE
chr3	122078189	122078689	501	*	TRUE
chr1	193173301	193173801	501	*	TRUE
chr1	193138184	193138684	501	*	TRUE
chr14	121724687	121725187	501	*	TRUE
chr17	49895940	49896440	501	*	TRUE
chr4	139819954	139820454	501	*	TRUE
chr2	33193997	33194497	501	*	TRUE
chr15	75742502	75743002	501	*	TRUE
chr14	21959336	21959836	501	*	TRUE
chr16	25830836	25831336	501	*	TRUE
chr7	143704373	143704873	501	*	TRUE
chr1	193034909	193035409	501	*	TRUE
chr1	193111989	193112489	501	*	TRUE
chr12	24487548	24488048	501	*	TRUE
chr14	121771471	121771971	501	*	TRUE
chr1	192845530	192846030	501	*	TRUE
chr19	59162558	59163058	501	*	TRUE
chr4	46356695	46357195	501	*	TRUE
chr1	195203781	195204281	501	*	TRUE
chr2	33204964	33205464	501	*	TRUE
chr4	46368151	46368651	501	*	TRUE
chr14	105725784	105726284	501	*	TRUE
chr2	106600852	106601352	501	*	TRUE
chr17	35503818	35504318	501	*	TRUE
chr1	193152832	193153332	501	*	TRUE
chr11	76027646	76028146	501	*	TRUE
chr4	46346945	46347445	501	*	TRUE
chr9	122084068	122084568	501	*	TRUE
chr7	101840830	101841330	501	*	TRUE
chr4	46352383	46352883	501	*	TRUE
chr1	193154210	193154710	501	*	TRUE
chr14	121774340	121774840	501	*	TRUE
chr4	46347801	46348301	501	*	TRUE
chr1	75730553	75731053	501	*	TRUE
chr1	193143425	193143925	501	*	TRUE
chr14	56723493	56723993	501	*	TRUE
chr14	121696072	121696572	501	*	TRUE
chr1	193149400	193149900	501	*	TRUE
chr15	59673976	59674476	501	*	TRUE
chr8	32077242	32077742	501	*	TRUE
chr1	193162352	193162852	501	*	TRUE
chr12	80114249	80114749	501	*	TRUE
chr1	193130070	193130570	501	*	TRUE
chr1	193054201	193054701	501	*	TRUE
chr2	33230432	33230932	501	*	TRUE
chr10	88501389	88501889	501	*	TRUE
chr9	122097298	122097798	501	*	TRUE
chr4	139800422	139800922	501	*	TRUE
chr5	32588088	32588588	501	*	TRUE
chr10	73021220	73021720	501	*	TRUE
chr8	70476765	70477265	501	*	TRUE
chr12	10804449	10804949	501	*	TRUE
chr12	56808799	56809299	501	*	TRUE
chr5	35078546	35079046	501	*	TRUE
chr4	139825613	139826113	501	*	TRUE
chr4	46345038	46345538	501	*	TRUE
chr11	3144510	3145010	501	*	TRUE
chr2	33170697	33171197	501	*	TRUE
chr7	101858140	101858640	501	*	TRUE
chr14	121797054	121797554	501	*	TRUE
chr2	33290085	33290585	501	*	TRUE
chr1	193141108	193141608	501	*	TRUE
chr1	193381703	193382203	501	*	TRUE
chr6	30614302	30614802	501	*	TRUE
chr17	83129083	83129583	501	*	TRUE
chr1	193109782	193110282	501	*	TRUE
chr14	121611517	121612017	501	*	TRUE
chr1	194793182	194793682	501	*	TRUE
chr19	59169234	59169734	501	*	TRUE
chr5	35079126	35079626	501	*	TRUE
chr7	27354060	27354560	501	*	TRUE
chr10	120632015	120632515	501	*	TRUE
chr5	134540763	134541263	501	*	TRUE
chr14	121735658	121736158	501	*	TRUE
chr4	46337691	46338191	501	*	TRUE
chr14	121775066	121775566	501	*	TRUE
chr16	25834677	25835177	501	*	TRUE
chr1	93478913	93479413	501	*	TRUE
chr10	73030098	73030598	501	*	TRUE
chr9	119706646	119707146	501	*	TRUE
chr13	63555770	63556270	501	*	TRUE
chr4	46342085	46342585	501	*	TRUE
chr1	193142578	193143078	501	*	TRUE
chr2	33315675	33316175	501	*	TRUE
chr4	88327836	88328336	501	*	TRUE
chr4	139811716	139812216	501	*	TRUE
chr11	68381311	68381811	501	*	TRUE
chr1	75743178	75743678	501	*	TRUE
chr1	193140049	193140549	501	*	TRUE
chr14	25565666	25566166	501	*	TRUE
chr14	121798362	121798862	501	*	TRUE
chr11	22201003	22201503	501	*	TRUE
chr1	161765853	161766353	501	*	TRUE
chr2	33216665	33217165	501	*	TRUE
chr4	135272235	135272735	501	*	TRUE
chr2	10701268	10701768	501	*	TRUE
chr14	121797587	121798087	501	*	TRUE
chr11	103655409	103655909	501	*	TRUE
chr2	33177632	33178132	501	*	TRUE
chr14	121799053	121799553	501	*	TRUE
chr2	147182625	147183125	501	*	TRUE
chr14	121738997	121739497	501	*	TRUE
chr11	103666883	103667383	501	*	TRUE
chr9	55937126	55937626	501	*	TRUE
chr13	101801362	101801862	501	*	TRUE
chr8	77477433	77477933	501	*	TRUE
chr10	117017918	117018418	501	*	TRUE
chr1	193169848	193170348	501	*	TRUE
chr14	121719424	121719924	501	*	TRUE
chr2	33236868	33237368	501	*	TRUE
chr14	121697080	121697580	501	*	TRUE
