# Supplementary material for: An ARID3A-dependent progenitor lineage confers developmental robustness to palate morphogenesis
Source: Research Square preprint supplement (doi:10.21203/rs.3.rs-8871167/v1), 2026-02-24
Supplement: Supplementary file 3 [file a4e87093ca86881a862b3518.xlsx]

## Sheet: Sheet1
chr	start	end
chr1	3268337	3268746
chr1	4256399	4258826
chr1	4622256	4623466
chr1	4767365	4767586
chr1	4775587	4776139
chr1	4778331	4778837
chr1	4780792	4781052
chr1	4781728	4782626
chr1	4784031	4784430
chr1	4784669	4784868
chr1	4785102	4786226
chr1	4807537	4808483
chr1	4808549	4809281
chr1	4809638	4810583
chr1	4811383	4811582
chr1	4818652	4819004
chr1	4820636	4820948
chr1	4842248	4842559
chr1	4843823	4844159
chr1	4855488	4856080
chr1	4856834	4858955
chr1	4859196	4861066
chr1	4861465	4862329
chr1	4864856	4865059
chr1	4866916	4867315
chr1	4869090	4870461
chr1	4870467	4870779
chr1	4873999	4874222
chr1	4874844	4875167
chr1	4876274	4876483
chr1	4883525	4883806
chr1	4884687	4884969
chr1	4885202	4885401
chr1	4889220	4889419
chr1	4893931	4894205
chr1	4897955	4898376
chr1	5072254	5072850
chr1	5082424	5083794
chr1	5084156	5086290
chr1	5087027	5087665
chr1	5088279	5088483
chr1	5088666	5088985
chr1	5089196	5089954
chr1	5092893	5093360
chr1	5098450	5098707
chr1	5103388	5105091
chr1	5109456	5114619
chr1	5128439	5128700
chr1	5142573	5143138
chr1	5145615	5146406
chr1	5146575	5147126
chr1	5261185	5261923
chr1	6188252	6189582
chr1	6190048	6191314
chr1	6191591	6191887
chr1	6203943	6204264
chr1	6206385	6206783
chr1	6210468	6211563
chr1	6212107	6215941
chr1	6216364	6217415
chr1	6218385	6218680
chr1	6218820	6219623
chr1	6220668	6223121
chr1	6224560	6225338
chr1	6225521	6225804
chr1	6226186	6226509
chr1	6230251	6230533
chr1	6232351	6232629
chr1	6232789	6233144
chr1	6235399	6235680
chr1	6237067	6237270
chr1	6262939	6263357
chr1	6269751	6270033
chr1	6454103	6454410
chr1	6928328	6928638
chr1	6973795	6974058
chr1	7087121	7087356
chr1	7087853	7091197
chr1	7092955	7093576
chr1	7095483	7096450
chr1	7099540	7099957
chr1	7101965	7102276
chr1	7102481	7103260
chr1	7103517	7103799
chr1	7105053	7105562
chr1	7111568	7112298
chr1	7112850	7113528
chr1	7113989	7114426
chr1	7118088	7118530
chr1	7118686	7119308
chr1	7120645	7121042
chr1	7134657	7134856
chr1	7138271	7138502
chr1	7139412	7139672
chr1	7141699	7142268
chr1	7143840	7144044
chr1	7149710	7149962
chr1	7161332	7161781
chr1	7162844	7163220
chr1	7382443	7382766
chr1	7383944	7384235
chr1	7387257	7387835
chr1	7387986	7388234
chr1	7397182	7398714
chr1	7476693	7476900
chr1	7479997	7482019
chr1	7496386	7496721
chr1	7497799	7499661
chr1	7500648	7501140
chr1	7501730	7503235
chr1	7503854	7504053
chr1	7518718	7519063
chr1	7780396	7780598
chr1	8431547	8432113
chr1	8689086	8689285
chr1	8820761	8821273
chr1	9044974	9045173
chr1	9236300	9236838
chr1	9536032	9536257
chr1	9544809	9547232
chr1	9548064	9549137
chr1	9564592	9564791
chr1	9635269	9635965
chr1	9637309	9637759
chr1	9638386	9639904
chr1	9700556	9700788
chr1	9731430	9731642
chr1	9733527	9733749
chr1	9739703	9740040
chr1	9740586	9740829
chr1	9743414	9744035
chr1	9744577	9744955
chr1	9745381	9748939
chr1	9755178	9756597
chr1	9773016	9773393
chr1	9792397	9792718
chr1	9796789	9797133
chr1	9797400	9801856
chr1	9802289	9806326
chr1	9806899	9807293
chr1	9815938	9816137
chr1	9818058	9818403
chr1	9819258	9819504
chr1	9819898	9820530
chr1	9820772	9821005
chr1	9823255	9823538
chr1	9825146	9825353
chr1	9825481	9825804
chr1	9827062	9827578
chr1	9828550	9828993
chr1	9832073	9832478
chr1	9833008	9833869
chr1	9834046	9834473
chr1	9849852	9850168
chr1	9851249	9851481
chr1	9857765	9857964
chr1	9859246	9860046
chr1	9861774	9862262
chr1	9865223	9865562
chr1	9866485	9866773
chr1	9871836	9872035
chr1	9874053	9874805
chr1	9875951	9876941
chr1	9877370	9877655
chr1	9878484	9878755
chr1	9880523	9880722
chr1	9882940	9883646
chr1	9883958	9884751
chr1	9884933	9885496
chr1	9889945	9890548
chr1	9891898	9892300
chr1	9897520	9897719
chr1	9917506	9917724
chr1	9937421	9937814
chr1	9938785	9939227
chr1	9939751	9940232
chr1	9940497	9941866
chr1	9942188	9944831
chr1	9948093	9948323
chr1	10023981	10024310
chr1	10026854	10027443
chr1	10031420	10032105
chr1	10032649	10033347
chr1	10033937	10034560
chr1	10034854	10040451
chr1	10040613	10040840
chr1	10041762	10042068
chr1	10042768	10043542
chr1	10043732	10044434
chr1	10046358	10047091
chr1	10051539	10051738
chr1	10053341	10053682
chr1	10053860	10054707
chr1	10056565	10056997
chr1	10060707	10061331
chr1	10061668	10062396
chr1	10071325	10071622
chr1	10077239	10077450
chr1	10080757	10081134
chr1	10085298	10085664
chr1	10085813	10086045
chr1	10087410	10087805
chr1	10089629	10089963
chr1	10095207	10095608
chr1	10100005	10102969
chr1	10106186	10106758
chr1	10107833	10108042
chr1	10108048	10108304
chr1	10109113	10109412
chr1	10113683	10113882
chr1	10114567	10114934
chr1	10115652	10116133
chr1	10116301	10116500
chr1	10116664	10116881
chr1	10127504	10128277
chr1	10130413	10131330
chr1	10131623	10132398
chr1	10133915	10134114
chr1	10138446	10138751
chr1	10139367	10140100
chr1	10140256	10140826
chr1	10142258	10142467
chr1	10144288	10144713
chr1	10146556	10147224
chr1	10147827	10148950
chr1	10149362	10149897
chr1	10150444	10151727
chr1	10155472	10156008
chr1	10156991	10157386
chr1	10164909	10165543
chr1	10165709	10166931
chr1	10169479	10169764
chr1	10170459	10170921
chr1	10175513	10175800
chr1	10175967	10176245
chr1	10177390	10178036
chr1	10185299	10185594
chr1	10189723	10189922
chr1	10190267	10190524
chr1	10193646	10193845
chr1	10195003	10195234
chr1	10200635	10200847
chr1	10200975	10201435
chr1	10203692	10204217
chr1	10207154	10207857
chr1	10208540	10208855
chr1	10211419	10211782
chr1	10212103	10212502
chr1	10212790	10213076
chr1	10213583	10213782
chr1	10216672	10216871
chr1	10217154	10217664
chr1	10219843	10220173
chr1	10220768	10221131
chr1	10221352	10221693
chr1	10222638	10226492
chr1	10226713	10229407
chr1	10229589	10231024
chr1	10231309	10233871
chr1	10253679	10253985
chr1	10254322	10254738
chr1	10254852	10255272
chr1	10259697	10260041
chr1	10269278	10269669
chr1	10283358	10283741
chr1	10284444	10288476
chr1	10298706	10298905
chr1	10300017	10301709
chr1	10327565	10327887
chr1	10329390	10330974
chr1	10331126	10331401
chr1	10403515	10404282
chr1	10478135	10479063
chr1	10479670	10479994
chr1	10486218	10486424
chr1	10489360	10489747
chr1	10544562	10545198
chr1	10565166	10566573
chr1	10568928	10569171
chr1	10570321	10572028
chr1	10572639	10574023
chr1	10578574	10578869
chr1	10579487	10580071
chr1	10586197	10586396
chr1	10590046	10590253
chr1	10590800	10590999
chr1	10591376	10591723
chr1	10591758	10593579
chr1	10596584	10596810
chr1	10597207	10597684
chr1	10603733	10604079
chr1	10614600	10615177
chr1	10633337	10634606
chr1	10635791	10638332
chr1	10646061	10646373
chr1	10680990	10682200
chr1	10682486	10682871
chr1	10693534	10693879
chr1	10718062	10718545
chr1	10718789	10719204
chr1	10719231	10720280
chr1	10722067	10722266
chr1	10759314	10759570
chr1	11623375	11623574
chr1	11624261	11624859
chr1	11758989	11759288
chr1	11788561	11788765
chr1	11880777	11881101
chr1	12005273	12005545
chr1	12008821	12010149
chr1	12025973	12026202
chr1	12051332	12052269
chr1	12054999	12056379
chr1	12057000	12057199
chr1	12057963	12058162
chr1	12060961	12061354
chr1	12064672	12065041
chr1	12065071	12065416
chr1	12116779	12117298
chr1	12126761	12127317
chr1	12135942	12136143
chr1	12138728	12138956
chr1	12140206	12141601
chr1	12192876	12193269
chr1	12230758	12231198
chr1	12231933	12232182
chr1	12238211	12239331
chr1	12241946	12242213
chr1	12287442	12288612
chr1	12294593	12294903
chr1	12397946	12399078
chr1	12405554	12406047
chr1	12413127	12413558
chr1	12418928	12419385
chr1	12419631	12419837
chr1	12506200	12506399
chr1	12506559	12506996
chr1	12507959	12508533
chr1	12508694	12509093
chr1	12509565	12509970
chr1	12510376	12512407
chr1	12512544	12512982
chr1	12542483	12542722
chr1	12552644	12552910
chr1	12554423	12555022
chr1	12556107	12556318
chr1	12557509	12557859
chr1	12571807	12573874
chr1	12620449	12621173
chr1	12622856	12623451
chr1	12657357	12657945
chr1	12689584	12689802
chr1	12690168	12695640
chr1	12696048	12698928
chr1	12699092	12700355
chr1	12701222	12701430
chr1	12702164	12706966
chr1	12707497	12707905
chr1	12709508	12714943
chr1	12715017	12717594
chr1	12717983	12718642
chr1	12718829	12719845
chr1	12721019	12721534
chr1	12721711	12723520
chr1	12724826	12725161
chr1	12726107	12726750
chr1	12727302	12728097
chr1	12728390	12729850
chr1	12730608	12735236
chr1	12736216	12737447
chr1	12739657	12741265
chr1	12742418	12745677
chr1	12746204	12746556
chr1	12746707	12751511
chr1	12752046	12752532
chr1	12754080	12754957
chr1	12755371	12756121
chr1	12756423	12756933
chr1	12757778	12757977
chr1	12758480	12758679
chr1	12760243	12761206
chr1	12761434	12762037
chr1	12762125	12762324
chr1	12762673	12762883
chr1	12763950	12766625
chr1	12768159	12768696
chr1	12769142	12769623
chr1	12769996	12771926
chr1	12772387	12772930
chr1	12773752	12773962
chr1	12774940	12775877
chr1	12775903	12779693
chr1	12779982	12780190
chr1	12780429	12780773
chr1	12781355	12782063
chr1	12782419	12782639
chr1	12783145	12783463
chr1	12784161	12784622
chr1	12790722	12791068
chr1	12791419	12792376
chr1	12792514	12792887
chr1	12793248	12794317
chr1	12794990	12796400
chr1	12796910	12797333
chr1	12799109	12799401
chr1	12799646	12800570
chr1	12800842	12801230
chr1	12802773	12803138
chr1	12804628	12805022
chr1	12806323	12806833
chr1	12810587	12812255
chr1	12813891	12814347
chr1	12819986	12820417
chr1	12821636	12821868
chr1	12825139	12826903
chr1	12831114	12831445
chr1	12831848	12832811
chr1	12833013	12833541
chr1	12834247	12835098
chr1	12835762	12836866
chr1	12840481	12841824
chr1	12843639	12844102
chr1	12844707	12845090
chr1	12847080	12847842
chr1	12848145	12848819
chr1	12849109	12849813
chr1	12850037	12850511
chr1	12850706	12851043
chr1	12851260	12851662
chr1	12852088	12852312
chr1	12877717	12877916
chr1	12973810	12974209
chr1	12977130	12977329
chr1	12977602	12977824
chr1	12991213	12992758
chr1	13026564	13026763
chr1	13029314	13029520
chr1	13143787	13144434
chr1	13145660	13146272
chr1	13146316	13147044
chr1	13148290	13148794
chr1	13151659	13154339
chr1	13154534	13154893
chr1	13154932	13155143
chr1	13155956	13157051
chr1	13157257	13157896
chr1	13158385	13158742
chr1	13158743	13159416
chr1	13159705	13160088
chr1	13161431	13164324
chr1	13166194	13166415
chr1	13166643	13167117
chr1	13167631	13169549
chr1	13171278	13171676
chr1	13171927	13173065
chr1	13173365	13174637
chr1	13175064	13175263
chr1	13175554	13176204
chr1	13176656	13176902
chr1	13178999	13180137
chr1	13180439	13180960
chr1	13181257	13182155
chr1	13182426	13183192
chr1	13183605	13184161
chr1	13184311	13185057
chr1	13186101	13186583
chr1	13186978	13188752
chr1	13188918	13190232
chr1	13191567	13192989
chr1	13193308	13194649
chr1	13195340	13195768
chr1	13196105	13197820
chr1	13198873	13199155
chr1	13199584	13200293
chr1	13200304	13200962
chr1	13201182	13201962
chr1	13203433	13205031
chr1	13206333	13207681
chr1	13209200	13209569
chr1	13213819	13215848
chr1	13215977	13216738
chr1	13217241	13217469
chr1	13218773	13219702
chr1	13221384	13221583
chr1	13222554	13222952
chr1	13224726	13224943
chr1	13225518	13226857
chr1	13227337	13227639
chr1	13228279	13228526
chr1	13228730	13229276
chr1	13229495	13233113
chr1	13233454	13233672
chr1	13233858	13235984
chr1	13238097	13238906
chr1	13239458	13241454
chr1	13242295	13242633
chr1	13242705	13243137
chr1	13243528	13243727
chr1	13243983	13244210
chr1	13244563	13245414
chr1	13245873	13246146
chr1	13246713	13247126
chr1	13247268	13248169
chr1	13249816	13250015
chr1	13250190	13250786
chr1	13251005	13251204
chr1	13251277	13251486
chr1	13251664	13260089
chr1	13260602	13260854
chr1	13261041	13261590
chr1	13262880	13263869
chr1	13265461	13266041
chr1	13266312	13266950
chr1	13267202	13267718
chr1	13268045	13271021
chr1	13272025	13273270
chr1	13274206	13275445
chr1	13275701	13279183
chr1	13279684	13280873
chr1	13281345	13283398
chr1	13283747	13284017
chr1	13284239	13284882
chr1	13285034	13285512
chr1	13285778	13286273
chr1	13287232	13294030
chr1	13294632	13296043
chr1	13296371	13298489
chr1	13299064	13299483
chr1	13300251	13306363
chr1	13307849	13310812
chr1	13311106	13315658
chr1	13315935	13317591
chr1	13317889	13318088
chr1	13321589	13324183
chr1	13324663	13325931
chr1	13326171	13327195
chr1	13328531	13328945
chr1	13328975	13329174
chr1	13329496	13330077
chr1	13330258	13330881
chr1	13331179	13332160
chr1	13332351	13333124
chr1	13335489	13336939
chr1	13339635	13340098
chr1	13341030	13343681
chr1	13344384	13346567
chr1	13346818	13347951
chr1	13348139	13348623
chr1	13348861	13350449
chr1	13351228	13352524
chr1	13352759	13353106
chr1	13354238	13354563
chr1	13356261	13357913
chr1	13358288	13358909
chr1	13360220	13362042
chr1	13363126	13363974
chr1	13364132	13369733
chr1	13370842	13371168
chr1	13371666	13374842
chr1	13420310	13420847
chr1	13421099	13421570
chr1	13426643	13426991
chr1	13428040	13428753
chr1	13433046	13433252
chr1	13437627	13438045
chr1	13438662	13439685
chr1	13567763	13568147
chr1	13568516	13569229
chr1	13569528	13569894
chr1	13570161	13570885
chr1	13571593	13572094
chr1	13572232	13572784
chr1	13573786	13575449
chr1	13576230	13576919
chr1	13576933	13577146
chr1	13577465	13578166
chr1	13582077	13582454
chr1	13582857	13583278
chr1	13583555	13584928
chr1	13585164	13585554
chr1	13586528	13586906
chr1	13588037	13588470
chr1	13589059	13589827
chr1	13607140	13607342
chr1	13608596	13608898
chr1	13629225	13629674
chr1	13635189	13635388
chr1	13639229	13639969
chr1	13642981	13643929
chr1	13647753	13648199
chr1	13648232	13648431
chr1	13648503	13648944
chr1	13659361	13661238
chr1	13708740	13708952
chr1	13824542	13824741
chr1	13824925	13825183
chr1	13826308	13826542
chr1	13827198	13827491
chr1	13828113	13828312
chr1	13835043	13836429
chr1	13848581	13849794
chr1	13851778	13852066
chr1	13854618	13855526
chr1	13857198	13857716
chr1	13863238	13863476
chr1	13867348	13867694
chr1	13869189	13870061
chr1	13872699	13873004
chr1	13873691	13874244
chr1	13900747	13900946
chr1	14000670	14001357
chr1	14002345	14002698
chr1	14011803	14012033
chr1	14012729	14013039
chr1	14013488	14013704
chr1	14015651	14016056
chr1	14016655	14017175
chr1	14018079	14018313
chr1	14147495	14147894
chr1	14148525	14148900
chr1	14150088	14151143
chr1	14151327	14151629
chr1	14161109	14161599
chr1	14162667	14162963
chr1	14173236	14173678
chr1	14188425	14188674
chr1	14198573	14198802
chr1	14201881	14202196
chr1	14216851	14219042
chr1	14219705	14220862
chr1	14225083	14226613
chr1	14230775	14231097
chr1	14231956	14232666
chr1	14235666	14235865
chr1	14239405	14239770
chr1	14243307	14243579
chr1	14264418	14264797
chr1	14265155	14265561
chr1	14265848	14266640
chr1	14267670	14268798
chr1	14268964	14269216
chr1	14273883	14274151
chr1	14274626	14275132
chr1	14279537	14279742
chr1	14287615	14289027
chr1	14295691	14295994
chr1	14304508	14305084
chr1	14307127	14307690
chr1	14307985	14310343
chr1	14364421	14364909
chr1	14420565	14420764
chr1	14462677	14462983
chr1	14465168	14465576
chr1	14484363	14485094
chr1	14487511	14487854
chr1	14491260	14491464
chr1	14506658	14506902
chr1	15644882	15645081
chr1	15645493	15645922
chr1	15649430	15652124
chr1	15653649	15653996
chr1	15656671	15657125
chr1	15804748	15805035
chr1	15805196	15808051
chr1	15808215	15809264
chr1	15809545	15809833
chr1	15811294	15811832
chr1	15812746	15813268
chr1	15813409	15814467
chr1	15814644	15815704
chr1	15816205	15816479
chr1	15821420	15821649
chr1	15827533	15828630
chr1	15828693	15829351
chr1	15830205	15830404
chr1	15832029	15832337
chr1	15840809	15841031
chr1	15841160	15841489
chr1	15852468	15852753
chr1	15874758	15875012
chr1	15876840	15877121
chr1	15888096	15888324
chr1	15890966	15891216
chr1	15892573	15892927
chr1	15894357	15895186
chr1	15936371	15936665
chr1	15992590	15992946
chr1	15995879	15996661
chr1	15998389	15998745
chr1	16008024	16008224
chr1	16087437	16087705
chr1	16101307	16101706
chr1	16101723	16106703
chr1	16113011	16113304
chr1	16118102	16118490
chr1	16118539	16119588
chr1	16119997	16120349
chr1	16120977	16121225
chr1	16122821	16123554
chr1	16125786	16125985
chr1	16130015	16130673
chr1	16132510	16133371
chr1	16134176	16135155
chr1	16135477	16135930
chr1	16172389	16172705
chr1	16173931	16174137
chr1	16175107	16175328
chr1	16192417	16192616
chr1	16193269	16193910
chr1	16194551	16195275
chr1	16211171	16211506
chr1	16212049	16213824
chr1	16214179	16214428
chr1	16227877	16228689
chr1	16241180	16241736
chr1	16260822	16261021
chr1	16268501	16269227
chr1	16342585	16343316
chr1	16354870	16355087
chr1	16361011	16361255
chr1	16372050	16372467
chr1	16373774	16374402
chr1	16382068	16382466
chr1	16393871	16394240
chr1	16396648	16396967
chr1	16401757	16401981
chr1	16410295	16410764
chr1	16435708	16436727
chr1	16445903	16446756
chr1	16461828	16462067
chr1	16468821	16469040
chr1	16482799	16483259
chr1	16484555	16484754
chr1	16500489	16501257
chr1	16503418	16504174
chr1	16505339	16505860
chr1	16518399	16520182
chr1	16565308	16565718
chr1	16566029	16566302
chr1	16572731	16573008
chr1	16576657	16577051
chr1	16577766	16578788
chr1	16579408	16579812
chr1	16580409	16581348
chr1	16586024	16586454
chr1	16587476	16588273
chr1	16591443	16592022
chr1	16592486	16594367
chr1	16595388	16595675
chr1	16596381	16596630
chr1	16597954	16598866
chr1	16599107	16599388
chr1	16600839	16601677
chr1	16602209	16603137
chr1	16603431	16604365
chr1	16605078	16606247
chr1	16606433	16608752
chr1	16609106	16609818
chr1	16610833	16611559
chr1	16612589	16612990
chr1	16614337	16614677
chr1	16616201	16619901
chr1	16639861	16640113
chr1	16640264	16640463
chr1	16642203	16642526
chr1	16643566	16643766
chr1	16648212	16648455
chr1	16649574	16650680
chr1	16651141	16657963
chr1	16663808	16664323
chr1	16664812	16667567
chr1	16668743	16670021
chr1	16670558	16670829
chr1	16670980	16673568
chr1	16675333	16676699
chr1	16678520	16679059
chr1	16680668	16681404
chr1	16682216	16682562
chr1	16687034	16687270
chr1	16687535	16689590
chr1	16692665	16692949
chr1	16695281	16695613
chr1	16696394	16696712
chr1	16823996	16826129
chr1	16826623	16827187
chr1	16973555	16973819
chr1	16983807	16984006
chr1	16996692	16997517
chr1	16997947	16998156
chr1	16999474	16999845
chr1	17004019	17004344
chr1	17007881	17008900
chr1	17009968	17011075
chr1	17028726	17028925
chr1	17041933	17042594
chr1	17043052	17043251
chr1	17047555	17047766
chr1	17048064	17048497
chr1	17050185	17050988
chr1	17051611	17051924
chr1	17052868	17053074
chr1	17053534	17055079
chr1	17055080	17055708
chr1	17058051	17060680
chr1	17062571	17063042
chr1	17086605	17086804
chr1	17089998	17090351
chr1	17093501	17093823
chr1	17096633	17098193
chr1	17098565	17098964
chr1	17488872	17489277
chr1	17489490	17490689
chr1	17596204	17596420
chr1	17599997	17600542
chr1	17727233	17727432
chr1	18105008	18105425
chr1	18223393	18224161
chr1	18224473	18224816
chr1	19176141	19176480
chr1	19199152	19200025
chr1	19207023	19208406
chr1	19208683	19218882
chr1	19219313	19227728
chr1	19228402	19229663
chr1	19230473	19237595
chr1	19240004	19242067
chr1	19242068	19242392
chr1	19242833	19243032
chr1	19265019	19265655
chr1	19311640	19311841
chr1	19318124	19318535
chr1	19348089	19348303
chr1	19351408	19351743
chr1	19459072	19459278
chr1	19459824	19460646
chr1	19497756	19498119
chr1	19505613	19506622
chr1	19507442	19508391
chr1	19508855	19509441
chr1	19510063	19510897
chr1	19512168	19512608
chr1	19560881	19561455
chr1	19561626	19563385
chr1	19563630	19565494
chr1	19565806	19567658
chr1	19567866	19569573
chr1	19577968	19578170
chr1	19579802	19580806
chr1	19581426	19583312
chr1	19583739	19584905
chr1	19589952	19590227
chr1	19611780	19612710
chr1	19616421	19616631
chr1	19672581	19673145
chr1	19673624	19674090
chr1	19678822	19679105
chr1	19680596	19681684
chr1	19695733	19696319
chr1	19696743	19696997
chr1	19698325	19698599
chr1	19698890	19699799
chr1	19700279	19701032
chr1	19733086	19733701
chr1	19735470	19735893
chr1	19739377	19740639
chr1	19758075	19759033
chr1	19760309	19760831
chr1	19761000	19761200
chr1	19765549	19765876
chr1	19766889	19769085
chr1	19769305	19770456
chr1	19770928	19771214
chr1	19771726	19776282
chr1	19776441	19777742
chr1	19779071	19779270
chr1	19784964	19785180
chr1	19786568	19787692
chr1	19788332	19788707
chr1	19790624	19791377
chr1	19793905	19794709
chr1	19799434	19799662
chr1	19808255	19808463
chr1	19839301	19839529
chr1	19850159	19850433
chr1	19856275	19856493
chr1	19856987	19857448
chr1	19858217	19858914
chr1	19863087	19863601
chr1	19880503	19882398
chr1	19891620	19891819
chr1	19899347	19900179
chr1	19933855	19934287
chr1	19950061	19950646
chr1	19951051	19952411
chr1	19952910	19953246
chr1	19953388	19953596
chr1	19965046	19965396
chr1	19965927	19966299
chr1	19966475	19966801
chr1	19967402	19967601
chr1	19968788	19970515
chr1	19972162	19972471
chr1	19972951	19973793
chr1	19974944	19975897
chr1	20244182	20244381
chr1	20248552	20248953
chr1	20487415	20487729
chr1	20548097	20548678
chr1	20721900	20722413
chr1	20743954	20744302
chr1	20797437	20797850
chr1	20799295	20799773
chr1	20801881	20802083
chr1	20802925	20804229
chr1	20804762	20805767
chr1	20806704	20807197
chr1	20807256	20808345
chr1	20810064	20810585
chr1	20811034	20811688
chr1	20811803	20813777
chr1	20814077	20816128
chr1	20816579	20818952
chr1	20819120	20820546
chr1	20848958	20849220
chr1	20868814	20869096
chr1	20869430	20869752
chr1	20870824	20872316
chr1	20872503	20872702
chr1	20890339	20890828
chr1	20891225	20891629
chr1	20896198	20897046
chr1	20951355	20951754
chr1	20995232	20995622
chr1	20996787	20998124
chr1	20998271	20999826
chr1	21000329	21000545
chr1	21001285	21001484
chr1	21001867	21004489
chr1	21004767	21005147
chr1	21005565	21005881
chr1	21005921	21007664
chr1	21007998	21009681
chr1	21009913	21012462
chr1	21012619	21015577
chr1	21025659	21026332
chr1	21026792	21027327
chr1	21028239	21028637
chr1	21033007	21033523
chr1	21033767	21033966
chr1	21037055	21038872
chr1	21039061	21039899
chr1	21040715	21042468
chr1	21045359	21045903
chr1	21047360	21047743
chr1	21048365	21049154
chr1	21049953	21050211
chr1	21050332	21051172
chr1	21051477	21053672
chr1	21053939	21054410
chr1	21054755	21055081
chr1	21056243	21056977
chr1	21058345	21058559
chr1	21060077	21060315
chr1	21065183	21065691
chr1	21066163	21066481
chr1	21069298	21069528
chr1	21074029	21074838
chr1	21075913	21077371
chr1	21077946	21079774
chr1	21210075	21210869
chr1	21218331	21219060
chr1	21219234	21219643
chr1	21220234	21221236
chr1	21227733	21227953
chr1	21238248	21238500
chr1	21239942	21241294
chr1	21251834	21253902
chr1	21255774	21256103
chr1	21256260	21256806
chr1	21260380	21260706
chr1	21271457	21271783
chr1	21283396	21284603
chr1	21399133	21399727
chr1	21465812	21466069
chr1	21466417	21466714
chr1	21499249	21499648
chr1	21499823	21501163
chr1	21530669	21531145
chr1	21535017	21535890
chr1	21537792	21538151
chr1	21610862	21611211
chr1	21613512	21614619
chr1	21632672	21633048
chr1	21673409	21673713
chr1	21673883	21674200
chr1	21690440	21691786
chr1	21700241	21700443
chr1	21760836	21761103
chr1	21812289	21812576
chr1	21817806	21818178
chr1	21819786	21820355
chr1	21829574	21830785
chr1	21836523	21836948
chr1	21837713	21839887
chr1	21840299	21840697
chr1	21960533	21961353
chr1	22167556	22167779
chr1	22321259	22321603
chr1	23255884	23257394
chr1	23269465	23270030
chr1	23270737	23271786
chr1	23279865	23280167
chr1	23282218	23282720
chr1	23283181	23283739
chr1	23291658	23292020
chr1	23377546	23377801
chr1	23556151	23556350
chr1	23556380	23557105
chr1	23639139	23639563
chr1	23645120	23645468
chr1	23842045	23842533
chr1	23843778	23844123
chr1	23846080	23846279
chr1	23847774	23848024
chr1	23856365	23856603
chr1	23857253	23857832
chr1	23858243	23858442
chr1	23859579	23859837
chr1	23860213	23860427
chr1	23869627	23869997
chr1	23883012	23883219
chr1	23883567	23883779
chr1	23885443	23885935
chr1	23892220	23892478
chr1	23892965	23894102
chr1	23897017	23897815
chr1	23898423	23898769
chr1	23899170	23899458
chr1	23903345	23904084
chr1	23910937	23911328
chr1	23911668	23913735
chr1	23915473	23916009
chr1	23916260	23916482
chr1	23916992	23918281
chr1	23919363	23919989
chr1	23921482	23922209
chr1	23994226	23994429
chr1	23997701	23998151
chr1	24005219	24005940
chr1	24016458	24016724
chr1	24027549	24028182
chr1	24032825	24033520
chr1	24034988	24035248
chr1	24041081	24041338
chr1	24044212	24044521
chr1	24045173	24045680
chr1	24056676	24057073
chr1	24062127	24062431
chr1	24063880	24064090
chr1	24072582	24072876
chr1	24073626	24073849
chr1	24074391	24074616
chr1	24082391	24083066
chr1	24084138	24084594
chr1	24086153	24086436
chr1	24088432	24088669
chr1	24097320	24097789
chr1	24099259	24101224
chr1	24101891	24102966
chr1	24107311	24108754
chr1	24111418	24111672
chr1	24290028	24290437
chr1	24291079	24291278
chr1	24310989	24311247
chr1	24331158	24331407
chr1	24511300	24512205
chr1	24512687	24513129
chr1	24557130	24557704
chr1	24562313	24562577
chr1	24611543	24616230
chr1	24676426	24676631
chr1	24677563	24680615
chr1	24680781	24681328
chr1	24681970	24682212
chr1	24683042	24683455
chr1	24683898	24684980
chr1	24685412	24686104
chr1	24691934	24692256
chr1	24699721	24699942
chr1	24705000	24705421
chr1	24707190	24707468
chr1	24707675	24708025
chr1	24708479	24708834
chr1	24715172	24715469
chr1	24721264	24721463
chr1	24729070	24731572
chr1	24731780	24732417
chr1	24733166	24733458
chr1	24735388	24735633
chr1	24739434	24739635
chr1	24741930	24742336
chr1	24745276	24745713
chr1	24751149	24751625
chr1	24752820	24753216
chr1	24758486	24758812
chr1	24760397	24760613
chr1	24763602	24763838
chr1	24799256	24799455
chr1	25018748	25018983
chr1	25042085	25042284
chr1	25896949	25897452
chr1	26686041	26686248
chr1	26687056	26687571
chr1	26687969	26688374
chr1	27261065	27261406
chr1	28025856	28026345
chr1	28026443	28027159
chr1	30042699	30043184
chr1	30047136	30047391
chr1	30059465	30059888
chr1	30060843	30061495
chr1	30184228	30184476
chr1	30719771	30719970
chr1	30720137	30720496
chr1	30793001	30793226
chr1	30801754	30802147
chr1	30805728	30806160
chr1	30807482	30808959
chr1	30809114	30809440
chr1	30810346	30810545
chr1	30811278	30811664
chr1	30812639	30813124
chr1	30813446	30813805
chr1	30814369	30814568
chr1	30815821	30816041
chr1	30819161	30820043
chr1	30820373	30820634
chr1	30823155	30823647
chr1	30824126	30824363
chr1	30825405	30825651
chr1	30828411	30828941
chr1	30829926	30830430
chr1	30831096	30831339
chr1	30832097	30833148
chr1	30833705	30834494
chr1	30835506	30835783
chr1	30835955	30836542
chr1	30836829	30837063
chr1	30839693	30840113
chr1	30842025	30842352
chr1	30845507	30845935
chr1	30847044	30848335
chr1	30849822	30850204
chr1	30850503	30850705
chr1	30851828	30852225
chr1	30852507	30853202
chr1	30860091	30860320
chr1	30861169	30862187
chr1	30862516	30862823
chr1	30864434	30864824
chr1	30864964	30865191
chr1	30866859	30867171
chr1	30867487	30869429
chr1	30869747	30869976
chr1	30870131	30871287
chr1	30871756	30875176
chr1	30875802	30876216
chr1	30876662	30876908
chr1	30908677	30909141
chr1	30944153	30944500
chr1	30944778	30945489
chr1	30945738	30947998
chr1	30948196	30950792
chr1	31095059	31095266
chr1	31143282	31144804
chr1	31149960	31150688
chr1	31164732	31164931
chr1	31778047	31778669
chr1	32443390	32443909
chr1	32701981	32702180
chr1	32959767	32960210
chr1	32960485	32960882
chr1	32961486	32961792
chr1	33239557	33239801
chr1	33240192	33240773
chr1	33451557	33451962
chr1	33461591	33462167
chr1	33466451	33466977
chr1	33468124	33468609
chr1	33469318	33470136
chr1	33489240	33489534
chr1	33490014	33490400
chr1	33491032	33491615
chr1	33502279	33502478
chr1	33502846	33503226
chr1	33507954	33508233
chr1	33510457	33510888
chr1	33520366	33520666
chr1	33521773	33522391
chr1	33525663	33525983
chr1	33526944	33528584
chr1	33529618	33530146
chr1	33542699	33542904
chr1	33543811	33544082
chr1	33548833	33549044
chr1	33556336	33556572
chr1	33567463	33568660
chr1	33568975	33569576
chr1	33570067	33570484
chr1	33580027	33580359
chr1	33583622	33584777
chr1	33585287	33585632
chr1	33587592	33588111
chr1	33589434	33590002
chr1	33601768	33602020
chr1	33602347	33602723
chr1	33618294	33618504
chr1	33624434	33624785
chr1	33625546	33625745
chr1	33625805	33626222
chr1	33629152	33632578
chr1	33633612	33634383
chr1	33636134	33636929
chr1	33637748	33637984
chr1	33642457	33643634
chr1	33644819	33645047
chr1	33648592	33649271
chr1	33650234	33650678
chr1	33651075	33651318
chr1	33652362	33652663
chr1	33656044	33656243
chr1	33657554	33658352
chr1	33664634	33664833
chr1	33665147	33665378
chr1	33665794	33666946
chr1	33667665	33668505
chr1	33669273	33670548
chr1	33719768	33720395
chr1	33724016	33724597
chr1	33725858	33726712
chr1	33730900	33731726
chr1	33732116	33734806
chr1	33735528	33736139
chr1	33737660	33738043
chr1	33738591	33739760
chr1	33744017	33744216
chr1	33746055	33746376
chr1	33747420	33747702
chr1	33747811	33748194
chr1	33749062	33749261
chr1	33757527	33757726
chr1	33774745	33775029
chr1	33779380	33779579
chr1	33783547	33783746
chr1	33788639	33789966
chr1	33791340	33793225
chr1	33793515	33793961
chr1	33795392	33795749
chr1	33796336	33796616
chr1	33796960	33797483
chr1	33797976	33798478
chr1	33799133	33799530
chr1	33800165	33800438
chr1	33802957	33803190
chr1	33804286	33804556
chr1	33805087	33805381
chr1	33806444	33806820
chr1	33807360	33807689
chr1	33808322	33808685
chr1	33810202	33810583
chr1	33810779	33812314
chr1	33812681	33814595
chr1	33930928	33932255
chr1	33959490	33959739
chr1	33962525	33963379
chr1	33963645	33963925
chr1	33982030	33982757
chr1	33986038	33986244
chr1	33988840	33989427
chr1	34023495	34023825
chr1	34033078	34033373
chr1	34035551	34035811
chr1	34036966	34037165
chr1	34038305	34038896
chr1	34044475	34044706
chr1	34048318	34048707
chr1	34051189	34052458
chr1	34061119	34061614
chr1	34062293	34065362
chr1	34067387	34068164
chr1	34069211	34071855
chr1	34072125	34075533
chr1	34076048	34078427
chr1	34086178	34086613
chr1	34088019	34088284
chr1	34089912	34090400
chr1	34090502	34091575
chr1	34092851	34093126
chr1	34094011	34095047
chr1	34095312	34095581
chr1	34096854	34098528
chr1	34101845	34102092
chr1	34102931	34104521
chr1	34104637	34105326
chr1	34106737	34107962
chr1	34108370	34108899
chr1	34109418	34110771
chr1	34111039	34111487
chr1	34112302	34112722
chr1	34112847	34113207
chr1	34113885	34114084
chr1	34114411	34115000
chr1	34116241	34118351
chr1	34120579	34122160
chr1	34124889	34126226
chr1	34127314	34127729
chr1	34128017	34128227
chr1	34130643	34131624
chr1	34133850	34134613
chr1	34135047	34135976
chr1	34136215	34136742
chr1	34139221	34146441
chr1	34146665	34147230
chr1	34147891	34165277
chr1	34165844	34166965
chr1	34167142	34168631
chr1	34169162	34169783
chr1	34169900	34171731
chr1	34171911	34172390
chr1	34172711	34173270
chr1	34173461	34173766
chr1	34174864	34175307
chr1	34180071	34180493
chr1	34182811	34183021
chr1	34183860	34185060
chr1	34185442	34187209
chr1	34187464	34187693
chr1	34188016	34188215
chr1	34189818	34190643
chr1	34190792	34192495
chr1	34193532	34193984
chr1	34194141	34194343
chr1	34196032	34196259
chr1	34199987	34200881
chr1	34202699	34204406
chr1	34204661	34205112
chr1	34206213	34207058
chr1	34207201	34207885
chr1	34211186	34211385
chr1	34212543	34212776
chr1	34215900	34216251
chr1	34218309	34218727
chr1	34219946	34220565
chr1	34220627	34220826
chr1	34221562	34222215
chr1	34223968	34224559
chr1	34224904	34225143
chr1	34225430	34226008
chr1	34236192	34236595
chr1	34241094	34241293
chr1	34242011	34242222
chr1	34242692	34242894
chr1	34243329	34243937
chr1	34246465	34246740
chr1	34249897	34250096
chr1	34250462	34251005
chr1	34251168	34251666
chr1	34251982	34252218
chr1	34252625	34253561
chr1	34254221	34255610
chr1	34258045	34259556
chr1	34259823	34260214
chr1	34260950	34261346
chr1	34262514	34262776
chr1	34270454	34270703
chr1	34276937	34277154
chr1	34278634	34278833
chr1	34281178	34281377
chr1	34281682	34281995
chr1	34285988	34286187
chr1	34287462	34287661
chr1	34289154	34289422
chr1	34292661	34292908
chr1	34293467	34293666
chr1	34297041	34297432
chr1	34298617	34299306
chr1	34300682	34301116
chr1	34301434	34301658
chr1	34305119	34305514
chr1	34306272	34307302
chr1	34433250	34433474
chr1	34433868	34434267
chr1	34434899	34435496
chr1	34437405	34437797
chr1	34438695	34438906
chr1	34439021	34440333
chr1	34442548	34443142
chr1	34443307	34444087
chr1	34444614	34444980
chr1	34445784	34446200
chr1	34682865	34683566
chr1	34683873	34685294
chr1	34686052	34687332
chr1	34703053	34703387
chr1	34714749	34715093
chr1	34716339	34716895
chr1	34716988	34717506
chr1	34717610	34717944
chr1	34718200	34719634
chr1	34719832	34721241
chr1	34721358	34724461
chr1	34738523	34739137
chr1	34739364	34740541
chr1	34740992	34741297
chr1	34741683	34743064
chr1	34769121	34769334
chr1	34787922	34788133
chr1	34791312	34791702
chr1	34801664	34802275
chr1	34803570	34803770
chr1	34804055	34804740
chr1	34809458	34813328
chr1	34813644	34817026
chr1	34817324	34821854
chr1	34822032	34836643
chr1	34836858	34843835
chr1	34849932	34850394
chr1	34850977	34851929
chr1	34852480	34853070
chr1	34858207	34859169
chr1	34860716	34861286
chr1	34861512	34861850
chr1	34862853	34863368
chr1	34863947	34864691
chr1	34877768	34878127
chr1	34879947	34880436
chr1	35189812	35190011
chr1	35263592	35263881
chr1	35353802	35354001
chr1	35358699	35359083
chr1	35359149	35359348
chr1	35471747	35471948
chr1	35629443	35630007
chr1	35630528	35631411
chr1	35631691	35632016
chr1	35656748	35656947
chr1	35685650	35685849
chr1	35759456	35759706
chr1	35763075	35763412
chr1	35769572	35769941
chr1	35785076	35785576
chr1	35797080	35797279
chr1	35805855	35806069
chr1	35809216	35810181
chr1	35810869	35811283
chr1	35811747	35812145
chr1	35813204	35813659
chr1	35813805	35814435
chr1	35814630	35815277
chr1	35825710	35826114
chr1	35826960	35827262
chr1	35849617	35849946
chr1	35850520	35850816
chr1	35851348	35851872
chr1	35853278	35853765
chr1	35854927	35855314
chr1	35862926	35863155
chr1	35874955	35875491
chr1	35875609	35876498
chr1	35877419	35877622
chr1	35878414	35878675
chr1	35879393	35879737
chr1	35881402	35881742
chr1	35913699	35914074
chr1	35917143	35917819
chr1	35918141	35918565
chr1	35918802	35919214
chr1	35926735	35926934
chr1	35928044	35929076
chr1	35930084	35930766
chr1	35930952	35931778
chr1	35938761	35939162
chr1	35939268	35940735
chr1	35941054	35941736
chr1	35941819	35942281
chr1	35945994	35946285
chr1	35952998	35954625
chr1	35956696	35957049
chr1	35957197	35957603
chr1	35959049	35959874
chr1	35960011	35964367
chr1	35968400	35968937
chr1	35970894	35971246
chr1	35971731	35972169
chr1	35972341	35972600
chr1	35973436	35973662
chr1	35974173	35974408
chr1	35976807	35977051
chr1	35984632	35984949
chr1	35986991	35987270
chr1	35991929	35992128
chr1	35993003	35993424
chr1	35993939	35994285
chr1	35995222	35995635
chr1	35996144	35996673
chr1	35999918	36000594
chr1	36002151	36002366
chr1	36003578	36003936
chr1	36004546	36005168
chr1	36006261	36007228
chr1	36007444	36007735
chr1	36008443	36009714
chr1	36010399	36012840
chr1	36013339	36014738
chr1	36015127	36016072
chr1	36016261	36021117
chr1	36023244	36023976
chr1	36024497	36026129
chr1	36026486	36026695
chr1	36030081	36030653
chr1	36038142	36038350
chr1	36049225	36049462
chr1	36052491	36052840
chr1	36053304	36054062
chr1	36054832	36055147
chr1	36055842	36056276
chr1	36056744	36058278
chr1	36058679	36065533
chr1	36066008	36067077
chr1	36067290	36067568
chr1	36067828	36086085
chr1	36086292	36097404
chr1	36097589	36101675
chr1	36102268	36106185
chr1	36109489	36110072
chr1	36112929	36113308
chr1	36116241	36117122
chr1	36130527	36130835
chr1	36136182	36136876
chr1	36137879	36138305
chr1	36139265	36142327
chr1	36142712	36144729
chr1	36146139	36146587
chr1	36146910	36147125
chr1	36147331	36147957
chr1	36148919	36149127
chr1	36149338	36149606
chr1	36154249	36154563
chr1	36155539	36155921
chr1	36160100	36160745
chr1	36161085	36161710
chr1	36161879	36163110
chr1	36170245	36171208
chr1	36171350	36171641
chr1	36172613	36172822
chr1	36180751	36180985
chr1	36181481	36181799
chr1	36182219	36182518
chr1	36186401	36186814
chr1	36187713	36188083
chr1	36189098	36190259
chr1	36192152	36192771
chr1	36198669	36199380
chr1	36199750	36199958
chr1	36200433	36200844
chr1	36202710	36202971
chr1	36207704	36207975
chr1	36208912	36209517
chr1	36218951	36219214
chr1	36220279	36220478
chr1	36221840	36222220
chr1	36222467	36222984
chr1	36224816	36225202
chr1	36225733	36226125
chr1	36232200	36232717
chr1	36233912	36236440
chr1	36237634	36237833
chr1	36238847	36239046
chr1	36239225	36244821
chr1	36271818	36272073
chr1	36303300	36303606
chr1	36307407	36308128
chr1	36321804	36322012
chr1	36323394	36323593
chr1	36327538	36328041
chr1	36330121	36330320
chr1	36330852	36331103
chr1	36334088	36334599
chr1	36335957	36337975
chr1	36338236	36338621
chr1	36338974	36339347
chr1	36339440	36339793
chr1	36341034	36341938
chr1	36342664	36343513
chr1	36343744	36344580
chr1	36344957	36345175
chr1	36346128	36349799
chr1	36349968	36350172
chr1	36351697	36352625
chr1	36353114	36353317
chr1	36353488	36355385
chr1	36355535	36357936
chr1	36357952	36360944
chr1	36361353	36362078
chr1	36362527	36364376
chr1	36364976	36366350
chr1	36366518	36369441
chr1	36415125	36415338
chr1	36415929	36416128
chr1	36417667	36418510
chr1	36418820	36419247
chr1	36419954	36420364
chr1	36420948	36421588
chr1	36421722	36422659
chr1	36422817	36423243
chr1	36423334	36423670
chr1	36423986	36424961
chr1	36425570	36426238
chr1	36426712	36427249
chr1	36428522	36429309
chr1	36429324	36430603
chr1	36431686	36431893
chr1	36432817	36433804
chr1	36435245	36435651
chr1	36437435	36437869
chr1	36442264	36442521
chr1	36444554	36445261
chr1	36471114	36471577
chr1	36473744	36474456
chr1	36474745	36476295
chr1	36476591	36476973
chr1	36478271	36478890
chr1	36479592	36480771
chr1	36485359	36486113
chr1	36488233	36488710
chr1	36492201	36492686
chr1	36496071	36496286
chr1	36496356	36496575
chr1	36497324	36497546
chr1	36498073	36498939
chr1	36499198	36499498
chr1	36499650	36500514
chr1	36501211	36502178
chr1	36504199	36504697
chr1	36505212	36506086
chr1	36507559	36508021
chr1	36511442	36512220
chr1	36512778	36513355
chr1	36514654	36515690
chr1	36515938	36519401
chr1	36520255	36522369
chr1	36522892	36523319
chr1	36523453	36526169
chr1	36526376	36527418
chr1	36528205	36529322
chr1	36529760	36532665
chr1	36532877	36534965
chr1	36535519	36535995
chr1	36536092	36536291
chr1	36537890	36538125
chr1	36539253	36539452
chr1	36539764	36539963
chr1	36541859	36542100
chr1	36542262	36542846
chr1	36543068	36543539
chr1	36544073	36544518
chr1	36545608	36560080
chr1	36561282	36562173
chr1	36563027	36563247
chr1	36566350	36567462
chr1	36567794	36570920
chr1	36571641	36577356
chr1	36578083	36579432
chr1	36579550	36581529
chr1	36581870	36582650
chr1	36582818	36584794
chr1	36585090	36585963
chr1	36586139	36586852
chr1	36587578	36588077
chr1	36588327	36590006
chr1	36590682	36590881
chr1	36592624	36592931
chr1	36593788	36594079
chr1	36595362	36596193
chr1	36599278	36599552
chr1	36600198	36600695
chr1	36601221	36601696
chr1	36602461	36604540
chr1	36605039	36609103
chr1	36609241	36614642
chr1	36614864	36615777
chr1	36630112	36630311
chr1	36630666	36631890
chr1	36633605	36637675
chr1	36637952	36638546
chr1	36643253	36643518
chr1	36647590	36648203
chr1	36665484	36665954
chr1	36679664	36679863
chr1	36684181	36684517
chr1	36690650	36693437
chr1	36693720	36694032
chr1	36694370	36694969
chr1	36695178	36695912
chr1	36696157	36700898
chr1	36700949	36710372
chr1	36744561	36744760
chr1	36778475	36778684
chr1	36779618	36779833
chr1	36789839	36790518
chr1	36790709	36791037
chr1	36791523	36791725
chr1	36793759	36794832
chr1	36795047	36800822
chr1	36801079	36807396
chr1	36807600	36808566
chr1	36809498	36809789
chr1	36809982	36810440
chr1	36810560	36810877
chr1	36811147	36811346
chr1	36812285	36812799
chr1	36813334	36814890
chr1	36815044	36815563
chr1	36815958	36816157
chr1	36816715	36817213
chr1	36818555	36819012
chr1	36819905	36820270
chr1	36821159	36821358
chr1	36822209	36822801
chr1	36824223	36825182
chr1	36826718	36827219
chr1	36828446	36828821
chr1	36829675	36831910
chr1	36832103	36832449
chr1	36832703	36833437
chr1	36834483	36834978
chr1	36835615	36836017
chr1	36836226	36837127
chr1	36838375	36838579
chr1	36839689	36840251
chr1	36840625	36841531
chr1	36841852	36842068
chr1	36843154	36846095
chr1	36847293	36847799
chr1	36848169	36848404
chr1	36849133	36849392
chr1	36850417	36853180
chr1	36854027	36854604
chr1	36855193	36855934
chr1	36856195	36858051
chr1	36858590	36860997
chr1	36861184	36863956
chr1	36864218	36865397
chr1	36867783	36867982
chr1	36868277	36868818
chr1	36869175	36869520
chr1	36869887	36872499
chr1	36872616	36873284
chr1	36873797	36875683
chr1	36876372	36877222
chr1	36877795	36878811
chr1	36879072	36882387
chr1	36882672	36891889
chr1	36892144	36895603
chr1	36895771	36897349
chr1	36897699	36899226
chr1	36899723	36900342
chr1	36900486	36905932
chr1	36907457	36907777
chr1	36907928	36908956
chr1	36909851	36910833
chr1	36911099	36912088
chr1	36912352	36916638
chr1	36917479	36925449
chr1	36925578	36927284
chr1	36927884	36930307
chr1	36930975	36932987
chr1	36933271	36940455
chr1	36941515	36941926
chr1	36947970	36948500
chr1	36948601	36950672
chr1	36968173	36968663
chr1	36996568	36996789
chr1	37060435	37060780
chr1	37061402	37061736
chr1	37076967	37077689
chr1	37081881	37082256
chr1	37085504	37085711
chr1	37087910	37088239
chr1	37088720	37089836
chr1	37090133	37090599
chr1	37105715	37106446
chr1	37106941	37107157
chr1	37109185	37109451
chr1	37111352	37111669
chr1	37112646	37112903
chr1	37116459	37117555
chr1	37119827	37120026
chr1	37121002	37121201
chr1	37121801	37122040
chr1	37122311	37122674
chr1	37122869	37123760
chr1	37123872	37126744
chr1	37129545	37129936
chr1	37131360	37131769
chr1	37140351	37140738
chr1	37145803	37146051
chr1	37164990	37165381
chr1	37178317	37178715
chr1	37179015	37180100
chr1	37181055	37183759
chr1	37183828	37184274
chr1	37184486	37185020
chr1	37185211	37185510
chr1	37185947	37187856
chr1	37188545	37189229
chr1	37189866	37190283
chr1	37190449	37190687
chr1	37190894	37191654
chr1	37192076	37192282
chr1	37194786	37195317
chr1	37206811	37209137
chr1	37213230	37213655
chr1	37214044	37216812
chr1	37231093	37233191
chr1	37247988	37248803
chr1	37252540	37252739
chr1	37252752	37252951
chr1	37253138	37253962
chr1	37254128	37254440
chr1	37288498	37288697
chr1	37299770	37300403
chr1	37306319	37306659
chr1	37308582	37309137
chr1	37312149	37312396
chr1	37313311	37314302
chr1	37315207	37315987
chr1	37316167	37316789
chr1	37317227	37317933
chr1	37318484	37318993
chr1	37322367	37322891
chr1	37324597	37325033
chr1	37331602	37332558
chr1	37334749	37335075
chr1	37335432	37335880
chr1	37336030	37336385
chr1	37340807	37341617
chr1	37348523	37348722
chr1	37349683	37350006
chr1	37350267	37350482
chr1	37350975	37352266
chr1	37357887	37358107
chr1	37358911	37359188
chr1	37362776	37363007
chr1	37363290	37363581
chr1	37366386	37366832
chr1	37367029	37367257
chr1	37368198	37368969
chr1	37370794	37371493
chr1	37372099	37372856
chr1	37373028	37373887
chr1	37374435	37374815
chr1	37375785	37375984
chr1	37376423	37377082
chr1	37377565	37377799
chr1	37378737	37380178
chr1	37381935	37382327
chr1	37386748	37386957
chr1	37387420	37387883
chr1	37389812	37391369
chr1	37391791	37392226
chr1	37392543	37394753
chr1	37394879	37395110
chr1	37396428	37396872
chr1	37397692	37398430
chr1	37398488	37399530
chr1	37405931	37406130
chr1	37408438	37408985
chr1	37409697	37409976
chr1	37410305	37410700
chr1	37418007	37418252
chr1	37419353	37419892
chr1	37420914	37421687
chr1	37425909	37426108
chr1	37426517	37426831
chr1	37427078	37437225
chr1	37437554	37437911
chr1	37438224	37438513
chr1	37439542	37440122
chr1	37440455	37441536
chr1	37442147	37443327
chr1	37445595	37445891
chr1	37447037	37447751
chr1	37448106	37448305
chr1	37449585	37449983
chr1	37450324	37450996
chr1	37452283	37452558
chr1	37455988	37456407
chr1	37457806	37458275
chr1	37458513	37460240
chr1	37461426	37461718
chr1	37464852	37465371
chr1	37465880	37466976
chr1	37469098	37469413
chr1	37469614	37470070
chr1	37470448	37470947
chr1	37471143	37471838
chr1	37473230	37474427
chr1	37474836	37476215
chr1	37477635	37477991
chr1	37479226	37479806
chr1	37481613	37481874
chr1	37483136	37483494
chr1	37490946	37492969
chr1	37493497	37493742
chr1	37493820	37494065
chr1	37494418	37494962
chr1	37495108	37495405
chr1	37495891	37497455
chr1	37497796	37498195
chr1	37500586	37501226
chr1	37501423	37501925
chr1	37503861	37504120
chr1	37504322	37505075
chr1	37505288	37505657
chr1	37508391	37515738
chr1	37516211	37518451
chr1	37519141	37521893
chr1	37522347	37524557
chr1	37524708	37525440
chr1	37525648	37526971
chr1	37527038	37527488
chr1	37527563	37527770
chr1	37528160	37529297
chr1	37530028	37530638
chr1	37532045	37532380
chr1	37532561	37533077
chr1	37533268	37534856
chr1	37535790	37536155
chr1	37540446	37540767
chr1	37541067	37541449
chr1	37546604	37547064
chr1	37547281	37547501
chr1	37583870	37584151
chr1	37599123	37599493
chr1	37599799	37600169
chr1	37606951	37607176
chr1	37612461	37612786
chr1	37613766	37617524
chr1	37617639	37618001
chr1	37618626	37619009
chr1	37680056	37680261
chr1	37685002	37685376
chr1	37687129	37687417
chr1	37720087	37720350
chr1	37723238	37723443
chr1	37850798	37850997
chr1	37864355	37865650
chr1	37871261	37873784
chr1	37876676	37878164
chr1	37879048	37879379
chr1	37881516	37882287
chr1	37883438	37884527
chr1	37885800	37886047
chr1	37886225	37893638
chr1	37893815	37894534
chr1	37894754	37895259
chr1	37895616	37896744
chr1	37971433	37971977
chr1	37986097	37986764
chr1	37989053	37989476
chr1	37990745	37992167
chr1	37992435	37993899
chr1	37994060	38001008
chr1	38002068	38002457
chr1	38002783	38003127
chr1	38003767	38004351
chr1	38007016	38007399
chr1	38008030	38008710
chr1	38009433	38010021
chr1	38011946	38013152
chr1	38014415	38014623
chr1	38015065	38015370
chr1	38018390	38018639
chr1	38019815	38020016
chr1	38021448	38021709
chr1	38023134	38023561
chr1	38024886	38025515
chr1	38025866	38026759
chr1	38027429	38027978
chr1	38028670	38029128
chr1	38029708	38030811
chr1	38031493	38032411
chr1	38035549	38037583
chr1	38037770	38039510
chr1	38041929	38042256
chr1	38042704	38042916
chr1	38044413	38044622
chr1	38045282	38046423
[truncated: 217,073+ more rows]
