# Supplementary material for: An ARID3A-dependent progenitor lineage confers developmental robustness to palate morphogenesis
Source: Research Square preprint supplement (doi:10.21203/rs.3.rs-8871167/v1), 2026-02-24
Supplement: Supplementary file 4 [file d38bfa85efefa9c6a799d3b8.xlsx]

## Sheet: TableS11_Fig6B_related
	stem cells	K5(-)	Transit	Mature K5(-)	K6+ cells	K14(-)	Shh(+)
Atf3	-1.61354	0.751442	0.751442	0.751442	0.751442	0.751442	0.751442
chr1:153129962-153130462	-1.5781	0.637963	0.637963	0.554571	0.637963	0.5972	0.637963
chr13:110419524-110420024	-1.4905	-0.0993328	0.685367	0.461032	0.685367	0.685367	0.685367
chr2:160261527-160262027	-1.34465	-0.597857	1.14309	1.14309	1.14309	1.14309	1.14309
Fosl2	-1.78755	0.0920272	0.501636	0.0453629	0.501636	0.501636	0.501636
Lamc2	-1.426	0.833339	0.833339	0.153697	0.833339	0.185273	0.509389
Plk2	-1.28255	-0.333729	0.936545	0.048461	0.936545	0.936545	0.348157
Bach1	-1.31197	-0.798461	1.25397	0.445722	1.25397	1.25397	1.25397
Fos	-0.845456	-1.46927	0.617542	0.381531	0.617542	0.42517	0.617542
Ikzf2	-1.16011	-0.700111	0.994473	0.414418	0.994473	0.994473	0.994473
Jun	0.676916	0.0928247	0.676916	0.672615	0.676916	0.676916	0.676916
Junb	-1.45471	-1.17027	3.01941	-0.481047	5.80983	5.80983	5.72765
Jund	-1.52197	0.607048	0.607048	0.607048	0.607048	0.607048	0.607048
Mafb	-1.2682	-0.793877	1.12738	0.35537	1.12738	1.12738	1.12738
Barx1	-0.270904	0.322756	-0.303294	0.322756	-1.61659	-1.49796	0.115028
chr3:69786949-69787449	-0.702956	0.842576	-0.720116	0.842576	-1.40988	-1.34758	-0.500276
chr3:30150528-30151028	-1.10709	0.121955	-0.415041	0.121955	-1.90142	-1.84714	-1.05229
chr6:29771997-29772497	0.371645	0.371645	0.371645	0.371645	-1.58857	-1.31125	0.371645
Tcf7l1	-0.736823	1.02209	-0.750032	1.02209	-1.28099	-1.23303	-0.580808
Sptssb	-0.735162	1.00623	-0.747553	1.00623	-1.24562	-1.20063	-0.58881
Sox2	-0.743697	-0.0969614	-0.0969614	-0.0969614	-1.50063	-1.66683	-1.22209
Mecom	-1.36424	0.246204	-0.104675	0.246204	-1.56296	-1.40035	-1.31373
Dlx2	-0.585874	0.253705	0.253705	-0.35978	-1.75048	-0.958468	0.253705
chr1:186278240-186278740	-1.0324	-0.107678	0.354232	-0.616532	-1.27637	0.354232	0.354232
chr13:72766901-72767401	-0.775503	-0.176429	0.5314	-0.652276	-1.41015	-0.978484	0.5314
chr11:81283170-81283670	-0.520782	0.355568	0.355568	0.355568	-1.59241	-1.24798	0.355568
Maf	-1.17264	0.251263	0.380079	-0.306068	-0.810793	0.0463188	0.380079
Tgfb2	-0.847847	-0.25466	0.41289	-0.581077	-1.00435	0.41289	0.41289
Irx2	-0.821728	-0.365344	0.866705	-0.727852	-1.30521	-0.976362	0.866705
Msx2	0.654508	0.654508	0.403218	0.321417	-1.38352	-1.1879	0.654508
Ahcyl2	0.620094	0.620094	0.421915	0.337793	-1.4155	-1.21435	0.620094
chr5:28664366-28664866	0.480004	-1.52171	-0.376889	0.480004	-0.220337	-0.75398	0.480004
chr15:101004396-101004896	-1.44287	-0.992931	0.646853	-0.367682	0.646853	-0.0496696	0.646853
Lef1	0.419693	-1.33723	-0.960865	0.405322	-0.909453	-0.588295	0.419693
Xbp1	0.458184	-1.39188	-0.562188	0.686145	-0.448729	-0.83548	0.686145
Shh	0.524011	-1.34586	-0.743945	0.524011	-0.661669	-0.824373	0.524011
chr3:36467546-36468046	-1.29006	0.417832	0.322983	0.417832	-0.142951	-0.270739	0.417832
Mafg	-1.1372	0.625142	0.028684	0.625142	-0.308087	-0.40045	0.625142
Anxa5	-1.14294	0.576009	0.00915393	0.576009	-0.323634	-0.414905	0.576009
Foxa1	-1.25241	0.348801	0.0382655	0.348801	-1.28936	-1.1142	-1.20723
chr3:30503697-30504197	-1.46978	0.301789	0.301789	0.301789	-1.33276	-1.31022	-1.26551
chr3:30254415-30254915	-1.21199	0.112	-0.0329322	0.112	-1.38208	-0.893977	-1.27266
chr3:30287133-30287633	-1.18801	0.396236	-0.213341	0.396236	-1.27358	-1.14426	-1.15161
Nfia	-1.32987	0.0720966	0.0720966	0.0720966	-0.678338	-0.931863	-0.770912
Sox5	-1.42854	0.264124	0.264124	0.264124	-1.41457	0.264124	-1.43255
Foxm1	-0.693623	-0.693623	-0.693623	-0.693623	-0.693623	-0.693623	-0.693623
chr9:61808476-61808976	-0.787868	-0.787868	-0.787868	-0.787868	-0.787868	-0.787868	-0.787868
chr1:189494589-189495089	-0.693083	-0.693083	-0.693083	-0.693083	-0.693083	-0.693083	-0.693083
Kif23	-0.785154	-0.785154	-0.785154	-0.785154	-0.785154	-0.785154	-0.785154
Cenpf	-0.664064	-0.664064	-0.664064	-0.664064	-0.664064	-0.664064	-0.664064
Grhl1	-1.10683	-1.07255	-0.567075	-0.989408	6.53787	6.53787	-0.240248
chr2:25172559-25173059	-1.22309	-1.14279	0.0404771	-0.948154	9.30991	9.30991	0.805443
chr6:142748842-142749342	-1.12177	-1.09161	-0.646702	-1.01843	9.77572	9.77572	-0.358997
chr15:100639929-100640429	-1.05504	-1.03398	-0.723306	-0.98289	4.02541	4.02541	-0.522377
Grhl3	-1.05625	-1.01484	-0.404391	-0.91443	15.9228	15.993	-0.00971319
Nrarp	-1.27704	-1.20945	-0.213514	-1.04563	7.98277	7.98277	0.430344
Cmas	-1.09498	-1.07045	-0.708571	-1.01093	9.16248	9.16248	-0.474556
Smagp	-1.04239	-1.02484	-0.765928	-0.982263	3.6128	3.6128	-0.598475
chr4:49197331-49197831	0.447649	0.447649	0.447649	-0.458996	-0.280476	-0.0683472	0.447649
chr13:55965183-55965683	-0.790921	0.111765	0.111765	0.111765	0.111765	-0.338383	0.111765
Klf6	-0.919415	0.45531	0.45531	0.45531	0.45531	-0.595136	0.45531
Maz	-0.766955	0.377933	0.377933	0.377933	0.377933	-0.50706	0.377933
Sox4	-0.965382	0.525278	0.525278	0.525278	0.113952	-0.784387	0.525278
Pitx1	0.415901	0.415901	0.415901	0.415901	0.415901	0.415901	-0.312776
Klf12	-0.928186	0.532545	0.37166	0.48934	-0.823147	-0.53994	-0.840515
chr1:69024901-69025401	-1.20278	0.361148	0.361148	0.361148	-1.02458	-0.544106	-1.05404
Erbb4	-1.19686	0.745172	0.514318	0.669236	-1.05858	-0.685753	-1.08144
chr9:35008002-35008502	0.590568	-1.14745	-0.934524	-0.161246	-0.905486	0.533254	0.590568
chr16:72909266-72909766	0.541072	-1.08283	-0.924331	-0.348566	-0.902729	-0.767351	0.541072
chr5:28785512-28786012	0.51165	-1.35648	-0.939435	0.51165	-0.882485	-0.806625	0.51165
Kirrel3	0.736795	-1.00342	-0.852464	-0.304245	-0.831877	0.736795	0.736795
Scmh1	0.740875	-1.09924	-0.96586	-0.481348	-0.947682	-0.83376	0.740875
Robo1	0.535151	-0.857898	-0.758646	-0.398111	-0.74512	-0.660348	0.535151
Lmx1b	0.65372	-0.627772	-1.00842	-0.873506	-1.18158	-0.803774	-1.06657
chr14:93242566-93243066	0.512403	-0.536521	-1.0419	-0.862778	-1.2718	-0.770196	-1.11911
Msx1	0.632925	-0.785255	-1.04925	-0.955662	-1.16928	-0.221068	-1.08957
Pcdh9	0.287521	0.274619	-0.96967	-0.528766	-1.53609	-1.14314	-1.15985
chr16:74623603-74624103	0.69983	-0.816201	-0.951295	-0.903367	-1.0126	-0.527218	-0.971895
Tfap2a	0.783922	-0.803289	-0.905462	-0.869214	-0.951828	-0.584726	-0.921043
Robo2	0.737229	-0.756839	-0.851125	-0.817675	-0.893911	-0.555149	-0.865503
chr4:29068181-29068681	-1.12368	0.100035	0.100035	0.100035	-1.1321	-0.665862	-1.26384
Epha7	-0.328566	0.324217	0.324217	0.324217	-0.428221	-0.0204969	-1.0053
Nfib	0.320725	-0.147455	-0.793726	-0.951821	-0.809265	0.58134	-0.378131
chr8:48941208-48941708	0.650283	-0.462056	-0.693609	-0.872062	-0.799364	-0.0277324	0.0800554
chr19:40347988-40348488	-0.0235702	-0.0907174	-0.774831	-0.966362	-0.693389	0.473716	-0.617504
Tcf12	0.670749	-0.48906	-0.654232	-0.781525	-0.729669	-0.179249	0.670749
Tenm3	0.715312	-0.516059	-0.531775	-0.825204	-0.77039	-0.188579	-0.107307
chr4:29084613-29085113	0.422801	0.422801	0.422801	0.422801	0.422801	0.422801	-0.745604
chr8:94946940-94947440	0.630951	0.630951	0.630951	0.630951	0.630951	0.630951	-0.510789
chr4:20510672-20511172	-0.849245	0.602948	-0.209194	0.602948	-1.19541	-1.27148	-1.06809
chr14:93288265-93288765	0.012719	0.012719	-0.53113	0.012719	-2.10919	-1.60062	-1.06094
Nkain3	-0.868097	1.04044	-0.368236	1.04044	-1.13844	-1.19785	-1.03901
chr13:29246465-29246965	-0.867012	0.437634	0.694571	0.694571	-0.137114	-0.744605	0.694571
chr14:58224561-58225061	-0.950766	0.2294	0.860596	0.860596	-0.29045	-0.840022	0.860596
Fgf9	-0.899758	-0.0310683	1.01439	1.01439	-0.413716	-0.818242	1.01439
Sox6	0.238376	0.238376	0.238376	-0.815249	-1.27865	-0.0911473	-0.576635
chr10:23165634-23166134	0.686186	0.686186	-0.137715	-0.970582	-1.25011	-0.533728	-0.826659
chr19:40349638-40350138	0.303378	0.303378	-0.368152	-0.948978	-0.839079	0.303378	-0.763437
Eya4	0.37425	0.979481	-0.323377	-0.975145	-1.19389	-0.633281	-0.862517
Tead1	-0.620845	-0.620845	-0.620845	1.1534	-0.620845	0.266848	-0.620845
chr10:115484442-115484942	-0.588171	-0.588171	-0.588171	1.06623	-0.588171	-0.00294849	-0.588171
Lgr5	-0.565374	-0.565374	-0.565374	1.02305	-0.565374	-0.105287	-0.565374
Isl1	-0.647511	0.645903	0.62338	0.645903	-1.4652	-1.20239	0.645903
Pou2f1	0.169315	0.169315	0.0530938	0.146697	-1.78991	-1.45918	0.169315
Asic2	-0.66669	0.626936	0.626936	0.159093	-1.50386	-1.23479	0.626936
Nr4a1	-1.22606	-0.932806	0.465178	-0.5253	0.908988	-0.318035	0.720726
Foxp1	-0.672556	0.687905	-0.672556	0.687905	-0.672556	-0.672556	-0.672556
chr1:162566664-162567164	-0.654192	0.636449	-0.654192	0.636449	-0.654192	-0.654192	-0.654192
Hmg20b	-0.681637	0.681957	-0.681637	0.447227	-0.681637	-0.681637	-0.681637
Ski	-0.670168	0.677888	-0.670168	0.436006	-0.670168	-0.670168	-0.670168
Prrc2c	-0.69301	0.737704	-0.69301	0.737704	-0.69301	-0.69301	-0.69301
Hivep1	-0.6171	-0.6171	-0.6171	-0.6171	1.10368	1.10368	-0.6171
chr12:35642425-35642925	-0.660179	-0.660179	-0.660179	-0.660179	1.17948	1.17948	-0.660179
Ahr	-0.680922	-0.680922	-0.680922	-0.680922	1.23017	1.23017	-0.680922
Pdlim1	-0.0226482	0.357693	-0.682104	-1.00051	-0.448178	0.403264	-0.7613
Otx1	0.757285	-0.430209	-0.430209	-0.430209	-0.430209	-0.430209	-0.430209
chr3:156936670-156937170	0.94173	-0.513302	-0.513302	-0.513302	-0.513302	-0.513302	-0.513302
Negr1	0.992573	-0.528438	-0.528438	-0.528438	-0.528438	-0.528438	-0.528438
Plppr1	0.484841	0.22822	0.484841	-0.464494	-0.368333	-0.254069	0.484841
Mt2	0.786589	0.786589	0.786589	0.786589	0.786589	0.786589	-0.556201
